# Supplementary material
Source: publisher figshare collection journal article supplement (https://geolsoc.figshare.com/articles/dataset/_/3452903)
Supplement: Supplementary file 1 [file 1]

| Analysis      | Interpretation  | U<br>(ppm) | Th<br>(ppm) | Pb<br>(ppm) | Th/U  | f <sub>206</sub> (%) | <sup>238</sup> U/ <sup>206</sup> Pb | ±σ (%) | <sup>207</sup> Pb/ <sup>206</sup> Pb | ±σ (%) | Disc.<br>(%) | <sup>207</sup> Pb/ <sup>206</sup> Pb<br>(Ma) | ±σ<br>(Ma) | <sup>206</sup> Pb/ <sup>238</sup> U<br>(Ma) | ±σ<br>(Ma) |
|---------------|-----------------|------------|-------------|-------------|-------|----------------------|-------------------------------------|--------|--------------------------------------|--------|--------------|----------------------------------------------|------------|---------------------------------------------|------------|
| <b>16/1-4</b> |                 |            |             |             |       |                      |                                     |        |                                      |        |              |                                              |            |                                             |            |
| n2479-2       | Crystallisation | 484        | 348         | 41          | 0.719 | 0.03                 | 15.09                               | 0.68   | 0.05507                              | 0.65   | -0.4         | 415                                          | 14         | 414                                         | 3          |
| n2479-4       | Crystallisation | 331        | 225         | 28          | 0.681 | {0.04}               | 14.80                               | 0.68   | 0.05506                              | 0.75   | 1.7          | 415                                          | 17         | 422                                         | 3          |
| n2479-5       | Crystallisation | 449        | 451         | 42          | 1.004 | 0.07                 | 14.72                               | 0.69   | 0.05484                              | 0.71   | 4.6          | 406                                          | 16         | 424                                         | 3          |
| n2479-7       | Crystallisation | 675        | 694         | 62          | 1.028 | 0.15                 | 15.03                               | 0.69   | 0.05504                              | 0.61   | 0.3          | 414                                          | 13         | 415                                         | 3          |
| n2479-8       | Crystallisation | 484        | 640         | 49          | 1.323 | 0.05                 | 14.72                               | 0.69   | 0.05549                              | 0.63   | -1.9         | 432                                          | 14         | 424                                         | 3          |
| n2479-9       | Crystallisation | 347        | 412         | 34          | 1.187 | {0.04}               | 14.53                               | 1.26   | 0.0544                               | 1.25   | 11.0         | 388                                          | 28         | 429                                         | 5          |
| n2479-16      | Crystallisation | 545        | 711         | 55          | 1.306 | 0.04                 | 14.52                               | 1.25   | 0.0554                               | 1.02   | -0.1         | 430                                          | 23         | 429                                         | 5          |
| n2479-17      | Crystallisation | 257        | 286         | 25          | 1.109 | {0.04}               | 14.68                               | 0.68   | 0.05572                              | 0.86   | -3.8         | 441                                          | 19         | 425                                         | 3          |
| n2479-19      | Crystallisation | 560        | 722         | 54          | 1.290 | 0.04                 | 15.17                               | 1.25   | 0.0549                               | 1.14   | 1.2          | 407                                          | 25         | 412                                         | 5          |
| n2479-20      | Outlier         | 448        | 442         | 38          | 0.987 | 0.12                 | 16.75                               | 1.30   | 0.0568                               | 2.27   | -23.6        | 485                                          | 49         | 374                                         | 5          |
| <b>16/6-1</b> |                 |            |             |             |       |                      |                                     |        |                                      |        |              |                                              |            |                                             |            |
| n2483-3       | Crystallisation | 396        | 184         | 33          | 0.466 | 0.15                 | 14.35                               | 1.37   | 0.0556                               | 1.27   | -0.9         | 438                                          | 28         | 434                                         | 6          |
| n2483-5       | Inherited       | 73         | 31          | 16          | 0.423 | {0.12}               | 5.374                               | 1.37   | 0.0729                               | 2.41   | 9.6          | 1011                                         | 48         | 1100                                        | 14         |
| n2483-7r      | Crystallisation | 739        | 197         | 59          | 0.266 | 0.19                 | 14.34                               | 1.35   | 0.05464                              | 0.98   | 9.6          | 398                                          | 22         | 435                                         | 6          |
| n2483-7c      | Inherited       | 201        | 121         | 20          | 0.599 | 0.36                 | 12.63                               | 1.32   | 0.0555                               | 2.25   | 14.5         | 431                                          | 49         | 491                                         | 6          |
| n2483-8       | Crystallisation | 720        | 334         | 60          | 0.464 | 0.03                 | 14.36                               | 1.40   | 0.05483                              | 0.84   | 7.3          | 405                                          | 19         | 434                                         | 6          |
| n2483-9       | Crystallisation | 735        | 454         | 62          | 0.618 | 0.15                 | 14.55                               | 1.50   | 0.0539                               | 1.32   | 17.8         | 366                                          | 30         | 429                                         | 6          |
| n2483-10      | Crystallisation | 866        | 280         | 66          | 0.323 | 0.08                 | 15.06                               | 1.40   | 0.05569                              | 0.96   | -6.0         | 440                                          | 21         | 414                                         | 6          |
| n2483-11      | Crystallisation | 434        | 165         | 34          | 0.380 | 1.19                 | 14.72                               | 1.46   | 0.0527                               | 2.52   | 36.0         | 314                                          | 56         | 424                                         | 6          |
| n2483-12      | Crystallisation | 157        | 71          | 13          | 0.452 | 0.24                 | 14.02                               | 1.33   | 0.0553                               | 1.95   | 5.0          | 423                                          | 43         | 444                                         | 6          |
| n2483-13      | Crystallisation | 801        | 358         | 65          | 0.446 | 0.10                 | 14.66                               | 1.42   | 0.05419                              | 0.93   | 12.6         | 379                                          | 21         | 425                                         | 6          |
| n2483-14      | Crystallisation | 384        | 140         | 31          | 0.364 | 0.06                 | 14.46                               | 1.38   | 0.0551                               | 1.16   | 3.8          | 416                                          | 26         | 431                                         | 6          |
| n2483-15      | Crystallisation | 705        | 298         | 59          | 0.423 | 0.24                 | 14.13                               | 1.66   | 0.0552                               | 1.24   | 5.3          | 419                                          | 27         | 441                                         | 7          |
| <b>16/3-2</b> |                 |            |             |             |       |                      |                                     |        |                                      |        |              |                                              |            |                                             |            |
| n2480-1       | Inherited       | 169        | 100         | 121         | 0.592 | 0.04                 | 1.905                               | 1.58   | 0.19431                              | 0.43   | -2.6         | 2779                                         | 7          | 2721                                        | 35         |
| n2480-2c      | Inherited       | 182        | 77          | 99          | 0.421 | 0.06                 | 2.364                               | 1.47   | 0.15761                              | 0.52   | -7.6         | 2430                                         | 9          | 2274                                        | 28         |
| n2480-2r      | Crystallisation | 527        | 146         | 44          | 0.277 | 0.21                 | 13.56                               | 1.48   | 0.0536                               | 1.31   | 31.1         | 353                                          | 29         | 459                                         | 7          |
| n2480-3r      | Crystallisation | 648        | 114         | 52          | 0.177 | 0.68                 | 13.82                               | 1.50   | 0.0561                               | 1.58   | -1.2         | 455                                          | 35         | 450                                         | 7          |
| n2480-4       | Inherited       | 832        | 557         | 214         | 0.669 | 0.11                 | 4.998                               | 1.49   | 0.08057                              | 0.47   | -3.2         | 1211                                         | 9          | 1176                                        | 16         |
| n2480-5c      | Inherited       | 495        | 59          | 113         | 0.119 | 29.11                | 5.038                               | 2.28   | 0.1457                               | 6.89   | -53.6        | 2297                                         | 114        | 1167                                        | 24         |
| n2480-5r      | Crystallisation | 1042       | 229         | 86          | 0.220 | 0.22                 | 13.66                               | 1.55   | 0.05619                              | 0.94   | -1.1         | 460                                          | 21         | 455                                         | 7          |
| n2480-6c      | Inherited       | 45         | 19          | 17          | 0.423 | 0.19                 | 3.233                               | 1.53   | 0.1109                               | 1.55   | -4.9         | 1815                                         | 28         | 1737                                        | 23         |
| n2480-6r      | Crystallisation | 953        | 176         | 80          | 0.185 | 0.96                 | 13.12                               | 1.64   | 0.0563                               | 2.44   | 2.3          | 463                                          | 53         | 474                                         | 7          |
| n2480-7       | Inherited       | 95         | 181         | 41          | 1.900 | 0.11                 | 3.868                               | 1.52   | 0.0920                               | 1.11   | 1.2          | 1467                                         | 21         | 1482                                        | 20         |
| n2480-8c      | Inherited       | 518        | 233         | 172         | 0.450 | 0.25                 | 3.698                               | 1.46   | 0.10712                              | 0.73   | -13.4        | 1751                                         | 13         | 1543                                        | 20         |

| Analysis      | Interpretation                               | U<br>(ppm) | Th<br>(ppm) | Pb<br>(ppm) | Th/U  | f <sub>206</sub> (%) | <sup>238</sup> U/ <sup>206</sup> Pb | ±σ (%) | <sup>207</sup> Pb/ <sup>206</sup> Pb | ±σ (%) | Disc.<br>(%) | <sup>207</sup> Pb/ <sup>206</sup> Pb<br>(Ma) | ±σ<br>(Ma) | <sup>206</sup> Pb/ <sup>238</sup> U<br>(Ma) | ±σ<br>(Ma) |
|---------------|----------------------------------------------|------------|-------------|-------------|-------|----------------------|-------------------------------------|--------|--------------------------------------|--------|--------------|----------------------------------------------|------------|---------------------------------------------|------------|
| n2480-8r      | Late metamorphism                            | 1260       | 242         | 83          | 0.192 | 3.71                 | 16.48                               | 1.48   | 0.0537                               | 3.51   | 6.5          | 357                                          | 77         | 380                                         | 5          |
| n2480-9       | Inherited                                    | 366        | 418         | 92          | 1.144 | 0.08                 | 5.634                               | 1.53   | 0.07480                              | 0.75   | -1.0         | 1063                                         | 15         | 1053                                        | 15         |
| n2480-10c     | Inherited                                    | 48         | 23          | 17          | 0.491 | 15.22                | 3.860                               | 1.86   | 0.1609                               | 5.16   | -44.4        | 2466                                         | 85         | 1485                                        | 25         |
| n2480-11c     | Inherited                                    | 364        | 110         | 118         | 0.303 | 0.12                 | 3.682                               | 1.57   | 0.11093                              | 0.67   | -16.5        | 1815                                         | 12         | 1549                                        | 22         |
| n2480-11r     | Crystallisation                              | 386        | 64          | 31          | 0.167 | 0.57                 | 13.56                               | 1.37   | 0.0555                               | 1.78   | 6.7          | 431                                          | 39         | 459                                         | 6          |
| n2480-13c     | Crystallisation                              | 101        | 51          | 8           | 0.505 | 1.39                 | 14.10                               | 1.46   | 0.0512                               | 6.37   | 78.8         | 251                                          | 140        | 442                                         | 6          |
| n2480-13r     | Crystallisation                              | 1081       | 93          | 87          | 0.086 | 0.28                 | 13.47                               | 1.46   | 0.0559                               | 1.15   | 2.7          | 450                                          | 25         | 462                                         | 7          |
| n2480-15c     | Inherited                                    | 132        | 48          | 41          | 0.366 | 0.11                 | 3.910                               | 1.47   | 0.09278                              | 0.96   | -1.2         | 1483                                         | 18         | 1468                                        | 19         |
| n2480-15r     | Late metamorphism                            | 1565       | 441         | 103         | 0.282 | 5.01                 | 17.07                               | 1.37   | 0.0570                               | 4.16   | -25.9        | 490                                          | 89         | 367                                         | 5          |
| n2480-16c     | Inherited                                    | 49         | 17          | 48          | 0.343 | 0.05                 | 1.452                               | 1.50   | 0.32732                              | 0.88   | -8.1         | 3605                                         | 13         | 3377                                        | 40         |
| n2480-17c     | Inherited                                    | 118        | 276         | 65          | 2.329 | 0.14                 | 3.170                               | 1.49   | 0.11075                              | 1.10   | -2.8         | 1812                                         | 20         | 1768                                        | 23         |
| n2480-17r     | Crystallisation                              | 991        | 93          | 79          | 0.093 | 0.11                 | 13.54                               | 1.48   | 0.05629                              | 1.00   | -1.0         | 464                                          | 22         | 459                                         | 7          |
| n2480-18c     | Inherited                                    | 125        | 46          | 26          | 0.371 | 0.10                 | 5.791                               | 1.41   | 0.0741                               | 1.40   | -1.8         | 1044                                         | 28         | 1027                                        | 13         |
| n2480-19c     | Inherited                                    | 44         | 49          | 30          | 1.129 | 0.15                 | 2.207                               | 1.40   | 0.2019                               | 1.02   | -18.2        | 2842                                         | 17         | 2409                                        | 28         |
| <b>16/4-1</b> |                                              |            |             |             |       |                      |                                     |        |                                      |        |              |                                              |            |                                             |            |
| n2481-1       | Inherited                                    | 270        | 90          | 61          | 0.332 | 0.04                 | 5.210                               | 1.46   | 0.07936                              | 0.94   | -4.5         | 1181                                         | 18         | 1132                                        | 15         |
| n2481-2c      | Inherited                                    | 177        | 164         | 81          | 0.928 | 0.08                 | 3.011                               | 1.46   | 0.11380                              | 0.67   | -0.8         | 1861                                         | 12         | 1848                                        | 23         |
| n2481-2r      | Crystallisation                              | 224        | 7           | 18          | 0.033 | 0.53                 | 13.52                               | 1.46   | 0.0536                               | 2.45   | 31.2         | 353                                          | 54         | 460                                         | 7          |
| n2481-3       | Crystallisation                              | 215        | 81          | 19          | 0.379 | 0.26                 | 13.28                               | 1.46   | 0.0578                               | 2.27   | -10.7        | 521                                          | 49         | 468                                         | 7          |
| n2481-4c      | Inherited                                    | 948        | 324         | 139         | 0.342 | 0.88                 | 8.156                               | 1.46   | 0.0706                               | 1.13   | -22.4        | 946                                          | 23         | 746                                         | 10         |
| n2481-4r      | Crystallisation                              | 944        | 436         | 85          | 0.462 | 0.10                 | 13.27                               | 1.70   | 0.0550                               | 1.02   | 13.6         | 414                                          | 23         | 468                                         | 8          |
| n2481-5       | Crystallisation                              | 1404       | 676         | 126         | 0.481 | 0.09                 | 13.44                               | 1.50   | 0.05615                              | 0.92   | 1.0          | 458                                          | 20         | 463                                         | 7          |
| n2481-7c      | Inherited                                    | 1133       | 682         | 189         | 0.602 | 0.05                 | 7.479                               | 1.43   | 0.07045                              | 0.52   | -15.0        | 942                                          | 11         | 809                                         | 11         |
| n2481-7r      | Crystallisation                              | 1402       | 528         | 127         | 0.376 | 0.05                 | 12.98                               | 1.56   | 0.05567                              | 0.68   | 9.3          | 439                                          | 15         | 479                                         | 7          |
| n2481-8c      | Inherited                                    | 466        | 154         | 79          | 0.331 | 0.11                 | 7.219                               | 1.46   | 0.08532                              | 0.84   | -39.2        | 1323                                         | 16         | 836                                         | 11         |
| n2481-8r      | Crystallisation                              | 784        | 166         | 62          | 0.212 | 0.76                 | 14.13                               | 1.46   | 0.0546                               | 1.79   | 11.2         | 398                                          | 40         | 441                                         | 6          |
| n2481-10c     | Inherited                                    | 101        | 56          | 39          | 0.559 | 0.69                 | 3.517                               | 1.46   | 0.1594                               | 1.08   | -38.5        | 2449                                         | 18         | 1613                                        | 21         |
| n2481-10r     | Crystallisation                              | 794        | 214         | 67          | 0.270 | 0.15                 | 13.38                               | 1.48   | 0.0561                               | 1.10   | 1.8          | 457                                          | 24         | 465                                         | 7          |
| n2481-12      | Crystallisation,<br>strongly discordant      | 248        | 172         | 23          | 0.694 | 0.62                 | 13.34                               | 1.44   | 0.0496                               | 2.56   | 173.6        | 174                                          | 59         | 466                                         | 6          |
| n2481-14c     | Inherited                                    | 140        | 42          | 19          | 0.298 | 0.49                 | 8.414                               | 1.43   | 0.0677                               | 1.92   | -16.6        | 859                                          | 39         | 724                                         | 10         |
| n2481-14r     | Late metamorphism,<br>high <sup>204</sup> Pb | 6065       | 1073        | 404         | 0.177 | 5.17                 | 16.69                               | 1.55   | 0.0551                               | 2.47   | -9.8         | 415                                          | 54         | 375                                         | 6          |
| n2481-19c     | Inherited                                    | 231        | 194         | 130         | 0.839 | 0.18                 | 2.560                               | 1.48   | 0.18731                              | 0.54   | -25.5        | 2719                                         | 9          | 2126                                        | 27         |
| n2481-19r     | Crystallisation                              | 1313       | 755         | 118         | 0.576 | 0.10                 | 13.664                              | 1.47   | 0.05516                              | 0.94   | 9.1          | 419                                          | 21         | 455                                         | 6          |

| Analysis         | Interpretation           | U<br>(ppm) | Th<br>(ppm) | Pb<br>(ppm) | Th/U  | f <sub>206</sub> (%) | <sup>238</sup> U/ <sup>206</sup> Pb | ±σ (%) | <sup>207</sup> Pb/ <sup>206</sup> Pb | ±σ (%) | Disc.<br>(%) | <sup>207</sup> Pb/ <sup>206</sup> Pb<br>(Ma) | ±σ<br>(Ma) | <sup>206</sup> Pb/ <sup>238</sup> U<br>(Ma) | ±σ<br>(Ma) |
|------------------|--------------------------|------------|-------------|-------------|-------|----------------------|-------------------------------------|--------|--------------------------------------|--------|--------------|----------------------------------------------|------------|---------------------------------------------|------------|
| <b>16/5-1</b>    |                          |            |             |             |       |                      |                                     |        |                                      |        |              |                                              |            |                                             |            |
| n2482-1c         | Inherited                | 113        | 29          | 25          | 0.258 | 0.28                 | 5.126                               | 1.46   | 0.0795                               | 1.67   | -3.2         | 1184                                         | 33         | 1149                                        | 15         |
| n2482-1r         | Crystallisation, outlier | 1380       | 418         | 102         | 0.303 | 2.79                 | 15.33                               | 1.46   | 0.0563                               | 2.70   | -12.5        | 464                                          | 59         | 407                                         | 6          |
| n2482-3c         | High <sup>204</sup> Pb   | 1646       | 3428        | 56          | 2.083 | 24.14                | 37.19                               | 1.81   | 0.0595                               | 26.47  | -71.7        | 585                                          | 490        | 171                                         | 3          |
| n2482-3r         | Crystallisation          | 697        | 226         | 60          | 0.324 | 0.54                 | 13.25                               | 1.39   | 0.0557                               | 1.95   | 6.3          | 442                                          | 43         | 469                                         | 6          |
| n2482-4          | Crystallisation          | 184        | 253         | 20          | 1.380 | 0.47                 | 13.48                               | 1.46   | 0.0578                               | 2.83   | -12.0        | 521                                          | 61         | 461                                         | 7          |
| n2482-5c         | Inherited                | 535        | 132         | 81          | 0.246 | 0.67                 | 7.680                               | 1.49   | 0.0749                               | 1.27   | -27.6        | 1066                                         | 25         | 789                                         | 11         |
| n2482-5r         | Crystallisation          | 1843       | 223         | 149         | 0.121 | 0.50                 | 13.43                               | 1.47   | 0.0557                               | 1.12   | 5.3          | 440                                          | 25         | 463                                         | 7          |
| n2482-6c         | Crystallisation          | 1108       | 628         | 104         | 0.567 | 0.08                 | 12.99                               | 1.45   | 0.05548                              | 0.85   | 11.2         | 432                                          | 19         | 478                                         | 7          |
| n2482-6r         | Crystallisation          | 1357       | 66          | 111         | 0.048 | 0.06                 | 13.09                               | 1.47   | 0.0566                               | 1.03   | -0.7         | 478                                          | 23         | 474                                         | 7          |
| n2482-7c         | Inherited                | 801        | 250         | 113         | 0.312 | 0.12                 | 8.342                               | 1.42   | 0.0771                               | 1.22   | -37.1        | 1125                                         | 24         | 730                                         | 10         |
| n2482-7r         | Crystallisation          | 1410       | 1087        | 128         | 0.771 | 1.97                 | 13.94                               | 1.67   | 0.0558                               | 2.33   | 0.6          | 444                                          | 51         | 447                                         | 7          |
| n2482-10c        | Inherited                | 24         | 28          | 12          | 1.163 | 0.75                 | 2.946                               | 1.45   | 0.1148                               | 2.50   | 0.4          | 1877                                         | 44         | 1884                                        | 24         |
| n2482-10r        | Crystallisation, outlier | 798        | 692         | 65          | 0.867 | 1.94                 | 14.73                               | 1.38   | 0.0586                               | 1.93   | -23.9        | 551                                          | 42         | 424                                         | 6          |
| n2482-12c        | Crystallisation          | 137        | 87          | 13          | 0.638 | 1.32                 | 13.21                               | 1.41   | 0.0540                               | 3.96   | 28.1         | 370                                          | 87         | 470                                         | 6          |
| n2482-12r        | Crystallisation          | 683        | 362         | 63          | 0.530 | 1.00                 | 13.25                               | 1.51   | 0.0555                               | 2.76   | 9.1          | 431                                          | 60         | 469                                         | 7          |
| n2482-16c        | High <sup>204</sup> Pb   | 784        | 255         | 122         | 0.325 | 19.23                | 7.249                               | 7.83   | 0.0844                               | 74.28  | -38.3        | 1302                                         | 1011       | 833                                         | 61         |
| n2482-16r        | Crystallisation          | 1056       | 449         | 91          | 0.425 | 1.07                 | 13.74                               | 1.75   | 0.0551                               | 1.34   | 8.8          | 417                                          | 30         | 453                                         | 8          |
| n2482-17         | Inherited                | 202        | 118         | 60          | 0.586 | 0.05                 | 4.265                               | 1.37   | 0.09062                              | 0.94   | -6.2         | 1439                                         | 18         | 1358                                        | 17         |
| n2482-18c        | Inherited                | 123        | 109         | 27          | 0.893 | 0.22                 | 5.987                               | 1.39   | 0.0740                               | 1.88   | -4.6         | 1040                                         | 38         | 996                                         | 13         |
| n2482-18r        | Crystallisation          | 575        | 127         | 48          | 0.221 | 2.07                 | 13.53                               | 1.37   | 0.0581                               | 3.67   | -14.2        | 533                                          | 78         | 460                                         | 6          |
| n2482-19         | Crystallisation          | 1004       | 333         | 80          | 0.332 | 1.21                 | 14.35                               | 1.63   | 0.0563                               | 1.44   | -6.8         | 465                                          | 32         | 434                                         | 7          |
| n2482-20         | Crystallisation          | 816        | 377         | 75          | 0.462 | 0.05                 | 13.14                               | 1.45   | 0.05610                              | 0.89   | 3.7          | 456                                          | 20         | 473                                         | 7          |
| <b>6407/10-3</b> |                          |            |             |             |       |                      |                                     |        |                                      |        |              |                                              |            |                                             |            |
| n2486-2          | Crystallisation          | 3249       | 1318        | 264         | 0.406 | 0.91                 | 14.54                               | 1.34   | 0.05565                              | 0.81   | -2.2         | 438                                          | 18         | 429                                         | 6          |
| n2486-3c         | Crystallisation, core    | 704        | 777         | 68          | 1.104 | 0.26                 | 14.30                               | 1.33   | 0.0558                               | 1.20   | -1.6         | 442                                          | 27         | 436                                         | 6          |
| n2486-3r         | High <sup>204</sup> Pb   | 2458       | 438         | 117         | 0.178 | 12.03                | 23.58                               | 1.32   | 0.0526                               | 4.32   | -14.9        | 314                                          | 95         | 268                                         | 3          |
| n2486-4c         | Crystallisation, core    | 1144       | 463         | 95          | 0.405 | 0.04                 | 14.18                               | 1.32   | 0.05538                              | 0.76   | 2.8          | 427                                          | 17         | 439                                         | 6          |
| n2486-7          | Crystallisation          | 1169       | 1119        | 110         | 0.957 | 0.14                 | 14.21                               | 1.31   | 0.05502                              | 0.85   | 6.4          | 413                                          | 19         | 438                                         | 6          |
| n2486-8          | Crystallisation          | 1596       | 427         | 129         | 0.268 | 0.10                 | 13.92                               | 1.38   | 0.05485                              | 0.67   | 10.5         | 406                                          | 15         | 447                                         | 6          |
| n2486-11         | Crystallisation          | 503        | 244         | 43          | 0.486 | 0.12                 | 14.21                               | 1.32   | 0.0550                               | 1.27   | 6.7          | 412                                          | 28         | 438                                         | 6          |
| <b>6306/10-1</b> |                          |            |             |             |       |                      |                                     |        |                                      |        |              |                                              |            |                                             |            |
| n2485-1          | Crystallisation          | 168        | 99          | 15          | 0.589 | {0.09}               | 13.83                               | 1.51   | 0.0568                               | 1.76   | -6.9         | 482                                          | 38         | 450                                         | 7          |

| Analysis        | Interpretation  | U<br>(ppm) | Th<br>(ppm) | Pb<br>(ppm) | Th/U  | f <sub>206</sub> (%) | <sup>238</sup> U/ <sup>206</sup> Pb | ±σ (%) | <sup>207</sup> Pb/ <sup>206</sup> Pb | ±σ (%) | Disc.<br>(%) | <sup>207</sup> Pb/ <sup>206</sup> Pb<br>(Ma) | ±σ<br>(Ma) | <sup>206</sup> Pb/ <sup>238</sup> U<br>(Ma) | ±σ<br>(Ma) |
|-----------------|-----------------|------------|-------------|-------------|-------|----------------------|-------------------------------------|--------|--------------------------------------|--------|--------------|----------------------------------------------|------------|---------------------------------------------|------------|
| n2485-2         | Crystallisation | 347        | 256         | 32          | 0.736 | {0.04}               | 13.91                               | 1.32   | 0.0577                               | 1.23   | -13.9        | 517                                          | 27         | 448                                         | 6          |
| n2485-5         | Crystallisation | 731        | 668         | 71          | 0.914 | 0.03                 | 13.75                               | 1.32   | 0.05527                              | 0.95   | 7.2          | 423                                          | 21         | 453                                         | 6          |
| n2485-6         | Crystallisation | 146        | 63          | 13          | 0.433 | {0.00}               | 13.68                               | 1.34   | 0.0553                               | 1.94   | 7.0          | 426                                          | 43         | 455                                         | 6          |
| n2485-7         | Crystallisation | 143        | 83          | 12          | 0.583 | 0.31                 | 14.21                               | 1.32   | 0.0533                               | 3.29   | 28.6         | 344                                          | 73         | 439                                         | 6          |
| n2485-8         | Crystallisation | 177        | 92          | 15          | 0.521 | 0.17                 | 14.06                               | 1.32   | 0.0555                               | 2.02   | 2.7          | 432                                          | 44         | 443                                         | 6          |
| n2485-16        | Crystallisation | 429        | 341         | 40          | 0.796 | 0.06                 | 13.76                               | 1.32   | 0.0555                               | 1.23   | 5.0          | 431                                          | 27         | 452                                         | 6          |
| n2485-19        | Crystallisation | 292        | 181         | 26          | 0.619 | 0.09                 | 14.21                               | 1.32   | 0.0547                               | 1.59   | 9.6          | 401                                          | 35         | 438                                         | 6          |
| <b>6609/7-1</b> |                 |            |             |             |       |                      |                                     |        |                                      |        |              |                                              |            |                                             |            |
| n2484-1-1c      | Detrital        | 65         | 20          | 21          | 0.304 | 0.07                 | 3.760                               | 1.61   | 0.0944                               | 1.29   | 0.2          | 1517                                         | 24         | 1520                                        | 22         |
| n2484-1-1c_14   | Detrital        | 681        | 362         | 230         | 0.532 | 0.02                 | 3.702                               | 1.59   | 0.09430                              | 0.39   | 2.0          | 1514                                         | 7          | 1541                                        | 22         |
| n2484-1-4       | Detrital        | 224        | 316         | 89          | 1.412 | 0.03                 | 3.811                               | 1.46   | 0.09403                              | 0.61   | -0.5         | 1509                                         | 12         | 1502                                        | 20         |
| n2484-1-5       | Detrital        | 998        | 416         | 304         | 0.417 | 0.82                 | 4.040                               | 1.63   | 0.0937                               | 6.40   | -5.7         | 1502                                         | 116        | 1426                                        | 21         |
| n2484-1-6       | Detrital        | 255        | 140         | 85          | 0.550 | 0.02                 | 3.794                               | 1.31   | 0.09444                              | 0.57   | -0.6         | 1517                                         | 11         | 1508                                        | 18         |
| n2484-1-8       | Detrital        | 45         | 13          | 14          | 0.282 | 0.15                 | 3.759                               | 1.31   | 0.0928                               | 1.46   | 2.8          | 1483                                         | 27         | 1521                                        | 18         |
| n2484-1-9       | Detrital        | 292        | 169         | 114         | 0.578 | 0.03                 | 3.252                               | 1.33   | 0.10198                              | 0.49   | 4.7          | 1660                                         | 9          | 1728                                        | 20         |
| n2484-1-10      | Detrital        | 289        | 8           | 55          | 0.026 | 0.02                 | 5.708                               | 1.33   | 0.07452                              | 0.73   | -1.5         | 1056                                         | 15         | 1041                                        | 13         |
| n2484-1-11      | Detrital        | 185        | 495         | 90          | 2.676 | 0.04                 | 3.862                               | 1.35   | 0.09330                              | 0.69   | -0.7         | 1494                                         | 13         | 1484                                        | 18         |
| n2484-1-13      | Detrital        | 175        | 82          | 87          | 0.470 | 0.05                 | 2.550                               | 1.33   | 0.13215                              | 0.51   | 0.3          | 2127                                         | 9          | 2133                                        | 24         |
| n2484-2-1       | Detrital        | 566        | 157         | 171         | 0.278 | 0.03                 | 3.944                               | 1.35   | 0.10676                              | 0.38   | -18.4        | 1745                                         | 7          | 1457                                        | 18         |
| n2484-2-2       | Detrital        | 706        | 300         | 171         | 0.425 | 0.01                 | 4.981                               | 1.38   | 0.07953                              | 0.48   | -0.6         | 1185                                         | 9          | 1179                                        | 15         |
| n2484-2-5       | Detrital        | 819        | 602         | 287         | 0.735 | 0.06                 | 3.715                               | 1.86   | 0.09904                              | 0.35   | -4.9         | 1606                                         | 7          | 1537                                        | 26         |
| n2484-2-6c      | Detrital        | 306        | 184         | 75          | 0.601 | 0.02                 | 5.128                               | 1.34   | 0.07737                              | 0.67   | 1.7          | 1131                                         | 13         | 1148                                        | 14         |
| n2484-2-6r      | Detrital        | 402        | 117         | 91          | 0.292 | 0.03                 | 5.138                               | 1.53   | 0.07751                              | 0.65   | 1.2          | 1134                                         | 13         | 1146                                        | 16         |
| n2484-2-7       | Detrital        | 552        | 21          | 108         | 0.037 | 0.13                 | 5.507                               | 1.56   | 0.07859                              | 0.60   | -8.0         | 1162                                         | 12         | 1076                                        | 15         |
| n2484-2-8       | Detrital        | 228        | 68          | 58          | 0.299 | {0.02}               | 4.632                               | 1.39   | 0.08163                              | 0.71   | 2.1          | 1237                                         | 14         | 1260                                        | 16         |
| n2484-2-9       | Detrital        | 401        | 94          | 98          | 0.234 | 0.01                 | 4.692                               | 1.32   | 0.08123                              | 0.55   | 1.6          | 1227                                         | 11         | 1245                                        | 15         |
| n2484-2-11      | Detrital        | 282        | 175         | 106         | 0.620 | 0.04                 | 3.410                               | 1.31   | 0.10218                              | 0.63   | -0.4         | 1664                                         | 12         | 1658                                        | 19         |
| n2484-2-12      | Detrital        | 175        | 75          | 56          | 0.429 | 0.07                 | 3.809                               | 1.33   | 0.09368                              | 0.84   | 0.1          | 1502                                         | 16         | 1503                                        | 18         |
| n2484-2-13      | Detrital        | 227        | 51          | 54          | 0.223 | 0.12                 | 4.816                               | 1.39   | 0.08067                              | 0.85   | 0.2          | 1213                                         | 17         | 1216                                        | 15         |
| n2484-2-15c     | Detrital        | 207        | 164         | 81          | 0.792 | 0.10                 | 3.431                               | 1.59   | 0.10215                              | 0.81   | -1.0         | 1664                                         | 15         | 1649                                        | 23         |
| n2484-2-15r     | Detrital        | 2152       | 97          | 211         | 0.045 | 0.13                 | 11.00                               | 1.37   | 0.07465                              | 0.53   | -49.1        | 1059                                         | 11         | 561                                         | 7          |
| n2484-2-16      | Detrital        | 118        | 142         | 35          | 1.200 | 0.18                 | 4.871                               | 1.53   | 0.0798                               | 1.36   | 1.2          | 1191                                         | 27         | 1204                                        | 17         |
| n2484-3-2c      | Detrital        | 1039       | 363         | 349         | 0.350 | 0.05                 | 3.583                               | 1.38   | 0.10656                              | 0.32   | -10.0        | 1741                                         | 6          | 1587                                        | 19         |
| n2484-3-2r      | Detrital        | 351        | 168         | 138         | 0.478 | 0.03                 | 3.183                               | 1.68   | 0.10712                              | 0.48   | 0.6          | 1751                                         | 9          | 1761                                        | 26         |
| n2484-3-5       | Detrital        | 246        | 159         | 89          | 0.645 | {0.01}               | 3.549                               | 1.32   | 0.09944                              | 0.57   | -0.9         | 1614                                         | 11         | 1600                                        | 19         |
| n2484-3-6       | Detrital        | 373        | 257         | 97          | 0.689 | 0.03                 | 4.957                               | 1.31   | 0.07814                              | 0.65   | 3.3          | 1150                                         | 13         | 1185                                        | 14         |
| n2484-3-8       | Detrital        | 132        | 48          | 45          | 0.367 | 0.20                 | 3.549                               | 1.31   | 0.09896                              | 0.86   | -0.3         | 1605                                         | 16         | 1600                                        | 19         |

| Analysis      | Interpretation | U<br>(ppm) | Th<br>(ppm) | Pb<br>(ppm) | Th/U  | f <sub>206</sub> (%) | <sup>238</sup> U/ <sup>206</sup> Pb | ±σ (%) | <sup>207</sup> Pb/ <sup>206</sup> Pb | ±σ (%) | Disc.<br>(%) | <sup>207</sup> Pb/ <sup>206</sup> Pb<br>(Ma) | ±σ<br>(Ma) | <sup>206</sup> Pb/ <sup>238</sup> U<br>(Ma) | ±σ<br>(Ma) |
|---------------|----------------|------------|-------------|-------------|-------|----------------------|-------------------------------------|--------|--------------------------------------|--------|--------------|----------------------------------------------|------------|---------------------------------------------|------------|
| n2484-3-9     | Detrital       | 417        | 246         | 127         | 0.590 | 0.12                 | 4.104                               | 1.90   | 0.09812                              | 0.69   | -12.8        | 1589                                         | 13         | 1406                                        | 24         |
| n2484-3-10    | Detrital       | 87         | 40          | 28          | 0.459 | 0.17                 | 3.775                               | 1.31   | 0.0939                               | 1.12   | 0.7          | 1505                                         | 21         | 1515                                        | 18         |
| <b>25/7-1</b> |                |            |             |             |       |                      |                                     |        |                                      |        |              |                                              |            |                                             |            |
| 25-7-1S_10m   | Detrital       | n.a.       | n.a.        | n.a.        | n.a.  | n.a.                 | 5.745                               | 1.60   | 0.071                                | 5.48   | 8.6          | 952                                          | 112        | 1034                                        | 15         |
| 25-7-1S_11m   | Detrital       | n.a.       | n.a.        | n.a.        | n.a.  | n.a.                 | 5.468                               | 3.33   | 0.084                                | 7.82   | -16.9        | 1303                                         | 152        | 1083                                        | 33         |
| 25-7-1S_12m   | Detrital       | n.a.       | n.a.        | n.a.        | n.a.  | n.a.                 | 3.562                               | 1.12   | 0.1035                               | 0.79   | -5.5         | 1688                                         | 15         | 1595                                        | 16         |
| 25-7-1S_13m   | Detrital       | n.a.       | n.a.        | n.a.        | n.a.  | n.a.                 | 6.446                               | 1.28   | 0.072                                | 1.48   | -6.9         | 999                                          | 30         | 930                                         | 11         |
| 25-7-1S_14m   | Detrital       | n.a.       | n.a.        | n.a.        | n.a.  | n.a.                 | 4.843                               | 1.13   | 0.086                                | 1.19   | -8.9         | 1329                                         | 23         | 1210                                        | 12         |
| 25-7-1S_15m   | Detrital       | n.a.       | n.a.        | n.a.        | n.a.  | n.a.                 | 5.110                               | 1.18   | 0.0826                               | 0.62   | -8.6         | 1261                                         | 12         | 1152                                        | 12         |
| 25-7-1S_16m   | Detrital       | n.a.       | n.a.        | n.a.        | n.a.  | n.a.                 | 6.179                               | 1.11   | 0.074                                | 1.33   | -6.7         | 1037                                         | 27         | 967                                         | 10         |
| 25-7-1S_17m   | Detrital       | n.a.       | n.a.        | n.a.        | n.a.  | n.a.                 | 6.270                               | 1.16   | 0.070                                | 2.82   | 1.4          | 940                                          | 58         | 954                                         | 10         |
| 25-7-1S_18m   | Detrital       | n.a.       | n.a.        | n.a.        | n.a.  | n.a.                 | 6.352                               | 1.07   | 0.074                                | 1.79   | -9.1         | 1037                                         | 36         | 943                                         | 9          |
| 25-7-1S_19m   | Detrital       | n.a.       | n.a.        | n.a.        | n.a.  | n.a.                 | 3.817                               | 1.15   | 0.0987                               | 0.58   | -6.2         | 1599                                         | 11         | 1500                                        | 15         |
| 25-7-1S_1m    | Detrital       | n.a.       | n.a.        | n.a.        | n.a.  | n.a.                 | 4.525                               | 1.15   | 0.0883                               | 0.71   | -7.4         | 1390                                         | 14         | 1287                                        | 13         |
| 25-7-1S_2,1   | Detrital       | n.a.       | n.a.        | n.a.        | n.a.  | n.a.                 | 3.708                               | 1.10   | 0.1019                               | 0.67   | -7.2         | 1659                                         | 12         | 1539                                        | 15         |
| 25-7-1S_2,10  | Detrital       | n.a.       | n.a.        | n.a.        | n.a.  | n.a.                 | 3.437                               | 1.05   | 0.1057                               | 0.62   | -4.7         | 1727                                         | 11         | 1646                                        | 15         |
| 25-7-1S_2,2   | Detrital       | n.a.       | n.a.        | n.a.        | n.a.  | n.a.                 | 4.952                               | 1.40   | 0.0832                               | 0.84   | -7.0         | 1275                                         | 16         | 1186                                        | 15         |
| 25-7-1S_2,3   | Detrital       | n.a.       | n.a.        | n.a.        | n.a.  | n.a.                 | 3.680                               | 1.11   | 0.1013                               | 0.44   | -6.0         | 1649                                         | 8          | 1550                                        | 15         |
| 25-7-1S_2,4   | Detrital       | n.a.       | n.a.        | n.a.        | n.a.  | n.a.                 | 3.883                               | 1.60   | 0.101                                | 1.43   | -9.7         | 1636                                         | 27         | 1477                                        | 21         |
| 25-7-1S_2,5   | Detrital       | n.a.       | n.a.        | n.a.        | n.a.  | n.a.                 | 4.573                               | 1.27   | 0.0877                               | 0.79   | -7.3         | 1375                                         | 15         | 1275                                        | 15         |
| 25-7-1S_2,6   | Detrital       | n.a.       | n.a.        | n.a.        | n.a.  | n.a.                 | 4.745                               | 1.63   | 0.0810                               | 0.55   | 0.9          | 1222                                         | 11         | 1233                                        | 18         |
| 25-7-1S_2,7   | Detrital       | n.a.       | n.a.        | n.a.        | n.a.  | n.a.                 | 5.339                               | 1.43   | 0.0758                               | 0.71   | 1.5          | 1091                                         | 14         | 1107                                        | 15         |
| 25-7-1S_2,8   | Detrital       | n.a.       | n.a.        | n.a.        | n.a.  | n.a.                 | 4.725                               | 1.96   | 0.087                                | 1.89   | -8.4         | 1351                                         | 36         | 1238                                        | 22         |
| 25-7-1S_2,9   | Detrital       | n.a.       | n.a.        | n.a.        | n.a.  | n.a.                 | 3.661                               | 1.22   | 0.103                                | 1.01   | -6.9         | 1672                                         | 19         | 1557                                        | 17         |
| 25-7-1S_20m   | Detrital       | n.a.       | n.a.        | n.a.        | n.a.  | n.a.                 | 4.583                               | 2.09   | 0.091                                | 1.45   | -12.1        | 1447                                         | 28         | 1272                                        | 24         |
| 25-7-1S_2m    | Detrital       | n.a.       | n.a.        | n.a.        | n.a.  | n.a.                 | 6.233                               | 1.20   | 0.073                                | 3.16   | -6.1         | 1022                                         | 64         | 959                                         | 11         |
| 25-7-1S_3,1   | Detrital       | n.a.       | n.a.        | n.a.        | n.a.  | n.a.                 | 4.457                               | 1.30   | 0.087                                | 1.57   | -4.3         | 1364                                         | 30         | 1305                                        | 15         |
| 25-7-1S_3,10  | Detrital       | n.a.       | n.a.        | n.a.        | n.a.  | n.a.                 | 3.845                               | 1.23   | 0.0940                               | 0.83   | -1.2         | 1508                                         | 16         | 1490                                        | 16         |
| 25-7-1S_3,2   | Detrital       | n.a.       | n.a.        | n.a.        | n.a.  | n.a.                 | 5.493                               | 1.89   | 0.085                                | 1.60   | -17.4        | 1305                                         | 31         | 1078                                        | 19         |
| 25-7-1S_3,3   | Detrital       | n.a.       | n.a.        | n.a.        | n.a.  | n.a.                 | 6.720                               | 1.21   | 0.064                                | 4.04   | 21.9         | 734                                          | 86         | 894                                         | 10         |
| 25-7-1S_3,4   | Detrital       | n.a.       | n.a.        | n.a.        | n.a.  | n.a.                 | 4.956                               | 1.59   | 0.084                                | 1.38   | -8.2         | 1291                                         | 27         | 1185                                        | 17         |
| 25-7-1S_3,5   | Detrital       | n.a.       | n.a.        | n.a.        | n.a.  | n.a.                 | 4.052                               | 1.60   | 0.091                                | 4.29   | -2.1         | 1453                                         | 82         | 1422                                        | 20         |
| 25-7-1S_3,6   | Detrital       | n.a.       | n.a.        | n.a.        | n.a.  | n.a.                 | 4.432                               | 1.23   | 0.0870                               | 1.00   | -3.7         | 1361                                         | 19         | 1312                                        | 15         |
| 25-7-1S_3,7   | Detrital       | n.a.       | n.a.        | n.a.        | n.a.  | n.a.                 | 5.400                               | 1.17   | 0.077                                | 1.41   | -3.0         | 1130                                         | 28         | 1095                                        | 12         |
| 25-7-1S_3,8   | Detrital       | n.a.       | n.a.        | n.a.        | n.a.  | n.a.                 | 3.974                               | 1.28   | 0.096                                | 1.89   | -6.3         | 1545                                         | 36         | 1447                                        | 17         |
| 25-7-1S_3,9   | Detrital       | n.a.       | n.a.        | n.a.        | n.a.  | n.a.                 | 6.085                               | 1.51   | 0.070                                | 2.37   | 5.5          | 930                                          | 49         | 981                                         | 14         |
| 25-7-1S_3m    | Detrital       | n.a.       | n.a.        | n.a.        | n.a.  | n.a.                 | 4.453                               | 2.69   | 0.093                                | 1.55   | -12.5        | 1492                                         | 29         | 1306                                        | 32         |
| 25-7-1S_4,1   | Detrital       | n.a.       | n.a.        | n.a.        | n.a.  | n.a.                 | 4.680                               | 1.87   | 0.085                                | 3.12   | -5.3         | 1318                                         | 60         | 1248                                        | 21         |

| Analysis      | Interpretation | U<br>(ppm) | Th<br>(ppm) | Pb<br>(ppm) | Th/U | f <sub>206</sub> (%) | <sup>238</sup> U/ <sup>206</sup> Pb | ±σ (%) | <sup>207</sup> Pb/ <sup>206</sup> Pb | ±σ (%) | Disc.<br>(%) | <sup>207</sup> Pb/ <sup>206</sup> Pb<br>(Ma) | ±σ<br>(Ma) | <sup>206</sup> Pb/ <sup>238</sup> U<br>(Ma) | ±σ<br>(Ma) |
|---------------|----------------|------------|-------------|-------------|------|----------------------|-------------------------------------|--------|--------------------------------------|--------|--------------|----------------------------------------------|------------|---------------------------------------------|------------|
| 25-7-1S_4,10  | Detrital       | n.a.       | n.a.        | n.a.        | n.a. | n.a.                 | 3.936                               | 1.63   | 0.0935                               | 0.86   | -2.6         | 1498                                         | 16         | 1459                                        | 21         |
| 25-7-1S_4,2   | Detrital       | n.a.       | n.a.        | n.a.        | n.a. | n.a.                 | 3.767                               | 1.12   | 0.0995                               | 0.62   | -6.1         | 1616                                         | 12         | 1518                                        | 15         |
| 25-7-1S_4,3   | Detrital       | n.a.       | n.a.        | n.a.        | n.a. | n.a.                 | 6.395                               | 1.13   | 0.075                                | 1.69   | -11.7        | 1060                                         | 34         | 937                                         | 10         |
| 25-7-1S_4,4   | Detrital       | n.a.       | n.a.        | n.a.        | n.a. | n.a.                 | 5.324                               | 1.14   | 0.077                                | 1.50   | -1.8         | 1129                                         | 30         | 1110                                        | 12         |
| 25-7-1S_4,5   | Detrital       | n.a.       | n.a.        | n.a.        | n.a. | n.a.                 | 4.030                               | 1.27   | 0.099                                | 1.96   | -11.3        | 1611                                         | 37         | 1429                                        | 16         |
| 25-7-1S_4,6   | Detrital       | n.a.       | n.a.        | n.a.        | n.a. | n.a.                 | 3.914                               | 1.31   | 0.097                                | 1.32   | -6.5         | 1569                                         | 25         | 1467                                        | 17         |
| 25-7-1S_4,7   | Detrital       | n.a.       | n.a.        | n.a.        | n.a. | n.a.                 | 6.143                               | 2.01   | 0.074                                | 1.41   | -6.5         | 1039                                         | 28         | 972                                         | 18         |
| 25-7-1S_4,8   | Detrital       | n.a.       | n.a.        | n.a.        | n.a. | n.a.                 | 4.227                               | 1.44   | 0.0977                               | 0.66   | -13.4        | 1580                                         | 12         | 1369                                        | 18         |
| 25-7-1S_4,9   | Detrital       | n.a.       | n.a.        | n.a.        | n.a. | n.a.                 | 4.135                               | 1.43   | 0.0948                               | 0.74   | -8.3         | 1523                                         | 14         | 1396                                        | 18         |
| 25-7-1S_4m    | Detrital       | n.a.       | n.a.        | n.a.        | n.a. | n.a.                 | 6.349                               | 1.32   | 0.073                                | 5.44   | -6.7         | 1010                                         | 111        | 943                                         | 12         |
| 25-7-1S_5,1   | Detrital       | n.a.       | n.a.        | n.a.        | n.a. | n.a.                 | 4.724                               | 1.95   | 0.0906                               | 0.83   | -13.9        | 1438                                         | 16         | 1238                                        | 22         |
| 25-7-1S_5,2   | Detrital       | n.a.       | n.a.        | n.a.        | n.a. | n.a.                 | 4.684                               | 1.07   | 0.0880                               | 0.75   | -9.8         | 1383                                         | 14         | 1248                                        | 12         |
| 25-7-1S_5,3   | Detrital       | n.a.       | n.a.        | n.a.        | n.a. | n.a.                 | 4.167                               | 1.40   | 0.0880                               | 0.75   | 0.4          | 1382                                         | 14         | 1387                                        | 17         |
| 25-7-1S_5,4   | Detrital       | n.a.       | n.a.        | n.a.        | n.a. | n.a.                 | 6.099                               | 1.29   | 0.068                                | 2.87   | 14.0         | 859                                          | 60         | 979                                         | 12         |
| 25-7-1S_5m    | Detrital       | n.a.       | n.a.        | n.a.        | n.a. | n.a.                 | 4.339                               | 1.68   | 0.0943                               | 0.99   | -11.7        | 1513                                         | 19         | 1337                                        | 20         |
| 25-7-1S_6m    | Detrital       | n.a.       | n.a.        | n.a.        | n.a. | n.a.                 | 5.929                               | 1.08   | 0.080                                | 1.04   | -16.9        | 1209                                         | 21         | 1005                                        | 10         |
| 25-7-1S_7m    | Detrital       | n.a.       | n.a.        | n.a.        | n.a. | n.a.                 | 4.196                               | 1.04   | 0.0935                               | 0.71   | -8.0         | 1498                                         | 13         | 1378                                        | 13         |
| 25-7-1S_8m    | Detrital       | n.a.       | n.a.        | n.a.        | n.a. | n.a.                 | 3.988                               | 1.57   | 0.0977                               | 0.97   | -8.7         | 1581                                         | 18         | 1442                                        | 20         |
| 25-7-1S_9m    | Detrital       | n.a.       | n.a.        | n.a.        | n.a. | n.a.                 | 6.575                               | 1.26   | 0.072                                | 1.89   | -7.7         | 989                                          | 39         | 913                                         | 11         |
| 25-7-2S_10,1  | Detrital       | n.a.       | n.a.        | n.a.        | n.a. | n.a.                 | 2.173                               | 1.70   | 0.2004                               | 0.70   | -13.7        | 2830                                         | 11         | 2441                                        | 35         |
| 25-7-2S_10,10 | Detrital       | n.a.       | n.a.        | n.a.        | n.a. | n.a.                 | 3.898                               | 1.40   | 0.0994                               | 0.57   | -8.7         | 1613                                         | 11         | 1472                                        | 18         |
| 25-7-2S_10,2  | Detrital       | n.a.       | n.a.        | n.a.        | n.a. | n.a.                 | 5.481                               | 1.21   | 0.0770                               | 0.77   | -3.7         | 1122                                         | 15         | 1080                                        | 12         |
| 25-7-2S_10,3  | Detrital       | n.a.       | n.a.        | n.a.        | n.a. | n.a.                 | 6.555                               | 1.33   | 0.072                                | 1.42   | -7.0         | 984                                          | 29         | 915                                         | 11         |
| 25-7-2S_10,4  | Detrital       | n.a.       | n.a.        | n.a.        | n.a. | n.a.                 | 5.426                               | 1.49   | 0.080                                | 3.14   | -9.0         | 1198                                         | 62         | 1090                                        | 15         |
| 25-7-2S_10,5  | Detrital       | n.a.       | n.a.        | n.a.        | n.a. | n.a.                 | 4.635                               | 1.89   | 0.0849                               | 0.72   | -4.2         | 1314                                         | 14         | 1259                                        | 22         |
| 25-7-2S_10,6  | Detrital       | n.a.       | n.a.        | n.a.        | n.a. | n.a.                 | 6.963                               | 2.11   | 0.066                                | 5.33   | 8.1          | 800                                          | 112        | 865                                         | 17         |
| 25-7-2S_10,7  | Detrital       | n.a.       | n.a.        | n.a.        | n.a. | n.a.                 | 3.603                               | 1.35   | 0.1001                               | 0.59   | -2.8         | 1625                                         | 11         | 1579                                        | 19         |
| 25-7-2S_10,8  | Detrital       | n.a.       | n.a.        | n.a.        | n.a. | n.a.                 | 4.281                               | 1.56   | 0.0922                               | 0.83   | -8.1         | 1472                                         | 16         | 1353                                        | 19         |
| 25-7-2S_10,9  | Detrital       | n.a.       | n.a.        | n.a.        | n.a. | n.a.                 | 3.776                               | 2.00   | 0.084                                | 1.18   | 16.7         | 1297                                         | 23         | 1514                                        | 27         |
| 25-7-2S_5,10  | Detrital       | n.a.       | n.a.        | n.a.        | n.a. | n.a.                 | 4.435                               | 1.52   | 0.0883                               | 0.66   | -5.6         | 1389                                         | 13         | 1311                                        | 18         |
| 25-7-2S_5,5   | Detrital       | n.a.       | n.a.        | n.a.        | n.a. | n.a.                 | 3.790                               | 1.17   | 0.098                                | 1.57   | -5.1         | 1591                                         | 29         | 1510                                        | 16         |
| 25-7-2S_5,6   | Detrital       | n.a.       | n.a.        | n.a.        | n.a. | n.a.                 | 3.859                               | 1.38   | 0.098                                | 1.17   | -6.0         | 1580                                         | 22         | 1485                                        | 18         |
| 25-7-2S_5,7   | Detrital       | n.a.       | n.a.        | n.a.        | n.a. | n.a.                 | 4.781                               | 1.65   | 0.080                                | 1.46   | 2.3          | 1197                                         | 29         | 1224                                        | 18         |
| 25-7-2S_5,8   | Detrital       | n.a.       | n.a.        | n.a.        | n.a. | n.a.                 | 4.655                               | 1.20   | 0.0872                               | 0.70   | -8.1         | 1365                                         | 13         | 1254                                        | 14         |
| 25-7-2S_5,9   | Detrital       | n.a.       | n.a.        | n.a.        | n.a. | n.a.                 | 6.097                               | 1.15   | 0.074                                | 2.75   | -5.0         | 1030                                         | 56         | 979                                         | 10         |
| 25-7-2S_6,1   | Detrital       | n.a.       | n.a.        | n.a.        | n.a. | n.a.                 | 4.260                               | 1.14   | 0.0892                               | 0.61   | -3.4         | 1408                                         | 12         | 1359                                        | 14         |
| 25-7-2S_6,10  | Detrital       | n.a.       | n.a.        | n.a.        | n.a. | n.a.                 | 3.829                               | 1.54   | 0.0974                               | 0.82   | -5.0         | 1575                                         | 15         | 1496                                        | 21         |
| 25-7-2S_6,2   | Detrital       | n.a.       | n.a.        | n.a.        | n.a. | n.a.                 | 6.297                               | 1.47   | 0.069                                | 5.73   | 5.8          | 898                                          | 118        | 950                                         | 13         |
| 25-7-2S_6,3   | Detrital       | n.a.       | n.a.        | n.a.        | n.a. | n.a.                 | 5.080                               | 1.54   | 0.085                                | 1.06   | -12.3        | 1320                                         | 21         | 1158                                        | 16         |

| Analysis     | Interpretation | U<br>(ppm) | Th<br>(ppm) | Pb<br>(ppm) | Th/U | f <sub>206</sub> (%) | <sup>238</sup> U/ <sup>206</sup> Pb | ±σ (%) | <sup>207</sup> Pb/ <sup>206</sup> Pb | ±σ (%) | Disc.<br>(%) | <sup>207</sup> Pb/ <sup>206</sup> Pb<br>(Ma) | ±σ<br>(Ma) | <sup>206</sup> Pb/ <sup>238</sup> U<br>(Ma) | ±σ<br>(Ma) |
|--------------|----------------|------------|-------------|-------------|------|----------------------|-------------------------------------|--------|--------------------------------------|--------|--------------|----------------------------------------------|------------|---------------------------------------------|------------|
| 25-7-2S_6,4  | Detrital       | n.a.       | n.a.        | n.a.        | n.a. | n.a.                 | 5.433                               | 1.24   | 0.0799                               | 0.68   | -8.8         | 1194                                         | 13         | 1089                                        | 12         |
| 25-7-2S_6,5  | Detrital       | n.a.       | n.a.        | n.a.        | n.a. | n.a.                 | 3.767                               | 1.35   | 0.0995                               | 0.63   | -6.0         | 1614                                         | 12         | 1518                                        | 18         |
| 25-7-2S_6,6  | Detrital       | n.a.       | n.a.        | n.a.        | n.a. | n.a.                 | 6.178                               | 1.43   | 0.074                                | 1.68   | -6.5         | 1035                                         | 34         | 967                                         | 13         |
| 25-7-2S_6,7  | Detrital       | n.a.       | n.a.        | n.a.        | n.a. | n.a.                 | 3.223                               | 1.35   | 0.1144                               | 0.98   | -6.9         | 1871                                         | 18         | 1742                                        | 21         |
| 25-7-2S_6,8  | Detrital       | n.a.       | n.a.        | n.a.        | n.a. | n.a.                 | 3.650                               | 1.09   | 0.1006                               | 0.66   | -4.5         | 1635                                         | 12         | 1561                                        | 15         |
| 25-7-2S_6,9  | Detrital       | n.a.       | n.a.        | n.a.        | n.a. | n.a.                 | 3.862                               | 1.44   | 0.0977                               | 0.92   | -6.2         | 1582                                         | 17         | 1484                                        | 19         |
| 25-7-2S_7,1  | Detrital       | n.a.       | n.a.        | n.a.        | n.a. | n.a.                 | 3.913                               | 1.41   | 0.0986                               | 0.90   | -8.2         | 1597                                         | 17         | 1467                                        | 18         |
| 25-7-2S_7,10 | Detrital       | n.a.       | n.a.        | n.a.        | n.a. | n.a.                 | 5.291                               | 1.37   | 0.080                                | 4.66   | -6.5         | 1194                                         | 92         | 1116                                        | 14         |
| 25-7-2S_7,2  | Detrital       | n.a.       | n.a.        | n.a.        | n.a. | n.a.                 | 3.934                               | 1.17   | 0.0937                               | 0.54   | -2.8         | 1502                                         | 10         | 1460                                        | 15         |
| 25-7-2S_7,3  | Detrital       | n.a.       | n.a.        | n.a.        | n.a. | n.a.                 | 6.362                               | 1.12   | 0.0747                               | 0.63   | -11.3        | 1061                                         | 13         | 941                                         | 10         |
| 25-7-2S_7,4  | Detrital       | n.a.       | n.a.        | n.a.        | n.a. | n.a.                 | 3.790                               | 2.69   | 0.0976                               | 0.94   | -4.4         | 1578                                         | 18         | 1509                                        | 36         |
| 25-7-2S_7,5  | Detrital       | n.a.       | n.a.        | n.a.        | n.a. | n.a.                 | 5.738                               | 1.28   | 0.076                                | 2.09   | -5.5         | 1097                                         | 42         | 1036                                        | 12         |
| 25-7-2S_7,6  | Detrital       | n.a.       | n.a.        | n.a.        | n.a. | n.a.                 | 2.111                               | 1.42   | 0.1935                               | 0.64   | -9.8         | 2772                                         | 10         | 2500                                        | 29         |
| 25-7-2S_7,7  | Detrital       | n.a.       | n.a.        | n.a.        | n.a. | n.a.                 | 4.588                               | 1.54   | 0.091                                | 4.99   | -12.0        | 1444                                         | 95         | 1271                                        | 18         |
| 25-7-2S_7,8  | Detrital       | n.a.       | n.a.        | n.a.        | n.a. | n.a.                 | 5.776                               | 1.29   | 0.077                                | 2.76   | -7.6         | 1113                                         | 55         | 1029                                        | 12         |
| 25-7-2S_7,9  | Detrital       | n.a.       | n.a.        | n.a.        | n.a. | n.a.                 | 3.044                               | 1.18   | 0.1196                               | 0.52   | -6.1         | 1950                                         | 9          | 1831                                        | 19         |
| 25-7-2S_8,1  | Detrital       | n.a.       | n.a.        | n.a.        | n.a. | n.a.                 | 4.761                               | 1.20   | 0.086                                | 1.29   | -8.4         | 1341                                         | 25         | 1229                                        | 13         |
| 25-7-2S_8,10 | Detrital       | n.a.       | n.a.        | n.a.        | n.a. | n.a.                 | 3.684                               | 1.09   | 0.1032                               | 0.68   | -8.0         | 1682                                         | 13         | 1548                                        | 15         |
| 25-7-2S_8,2  | Detrital       | n.a.       | n.a.        | n.a.        | n.a. | n.a.                 | 5.571                               | 1.25   | 0.0774                               | 0.52   | -5.9         | 1130                                         | 10         | 1064                                        | 12         |
| 25-7-2S_8,3  | Detrital       | n.a.       | n.a.        | n.a.        | n.a. | n.a.                 | 4.980                               | 1.42   | 0.079                                | 1.08   | 0.5          | 1174                                         | 21         | 1180                                        | 15         |
| 25-7-2S_8,4  | Detrital       | n.a.       | n.a.        | n.a.        | n.a. | n.a.                 | 5.751                               | 1.28   | 0.076                                | 1.98   | -6.5         | 1105                                         | 40         | 1033                                        | 12         |
| 25-7-2S_8,5  | Detrital       | n.a.       | n.a.        | n.a.        | n.a. | n.a.                 | 5.185                               | 1.30   | 0.077                                | 1.77   | 1.2          | 1123                                         | 35         | 1137                                        | 14         |
| 25-7-2S_8,6  | Detrital       | n.a.       | n.a.        | n.a.        | n.a. | n.a.                 | 3.690                               | 1.24   | 0.1009                               | 0.92   | -5.8         | 1641                                         | 17         | 1546                                        | 17         |
| 25-7-2S_8,7  | Detrital       | n.a.       | n.a.        | n.a.        | n.a. | n.a.                 | 6.024                               | 1.71   | 0.0753                               | 0.74   | -8.0         | 1077                                         | 15         | 990                                         | 16         |
| 25-7-2S_8,8  | Detrital       | n.a.       | n.a.        | n.a.        | n.a. | n.a.                 | 4.013                               | 1.13   | 0.094                                | 1.02   | -5.2         | 1513                                         | 19         | 1434                                        | 15         |
| 25-7-2S_8,9  | Detrital       | n.a.       | n.a.        | n.a.        | n.a. | n.a.                 | 5.610                               | 1.24   | 0.078                                | 1.03   | -7.0         | 1137                                         | 21         | 1057                                        | 12         |
| 25-7-2S_9,1  | Detrital       | n.a.       | n.a.        | n.a.        | n.a. | n.a.                 | 4.871                               | 1.28   | 0.0845                               | 0.55   | -7.7         | 1304                                         | 11         | 1204                                        | 14         |
| 25-7-2S_9,10 | Detrital       | n.a.       | n.a.        | n.a.        | n.a. | n.a.                 | 3.428                               | 1.38   | 0.1016                               | 0.54   | -0.2         | 1654                                         | 10         | 1650                                        | 20         |
| 25-7-2S_9,2  | Detrital       | n.a.       | n.a.        | n.a.        | n.a. | n.a.                 | 6.169                               | 1.28   | 0.0728                               | 0.95   | -4.1         | 1009                                         | 19         | 968                                         | 11         |
| 25-7-2S_9,3  | Detrital       | n.a.       | n.a.        | n.a.        | n.a. | n.a.                 | 3.563                               | 1.27   | 0.1036                               | 0.75   | -5.6         | 1690                                         | 14         | 1595                                        | 18         |
| 25-7-2S_9,4  | Detrital       | n.a.       | n.a.        | n.a.        | n.a. | n.a.                 | 5.865                               | 1.32   | 0.074                                | 1.16   | -2.9         | 1046                                         | 23         | 1015                                        | 12         |
| 25-7-2S_9,5  | Detrital       | n.a.       | n.a.        | n.a.        | n.a. | n.a.                 | 5.605                               | 1.19   | 0.0782                               | 0.81   | -8.2         | 1152                                         | 16         | 1058                                        | 12         |
| 25-7-2S_9,6  | Detrital       | n.a.       | n.a.        | n.a.        | n.a. | n.a.                 | 4.541                               | 2.17   | 0.086                                | 3.04   | -4.6         | 1346                                         | 59         | 1283                                        | 25         |
| 25-7-2S_9,7  | Detrital       | n.a.       | n.a.        | n.a.        | n.a. | n.a.                 | 5.274                               | 1.78   | 0.075                                | 1.44   | 5.6          | 1060                                         | 29         | 1119                                        | 18         |
| 25-7-2S_9,8  | Detrital       | n.a.       | n.a.        | n.a.        | n.a. | n.a.                 | 5.749                               | 1.11   | 0.0764                               | 0.65   | -6.5         | 1105                                         | 13         | 1034                                        | 11         |
| 25-7-2S_9,9  | Detrital       | n.a.       | n.a.        | n.a.        | n.a. | n.a.                 | 5.951                               | 1.39   | 0.0744                               | 0.80   | -4.9         | 1053                                         | 16         | 1001                                        | 13         |
