# Supplementary material
Source: publisher figshare collection journal article supplement (https://geolsoc.figshare.com/articles/dataset/_/3452903)
Supplement: Supplementary file 2 [file 1]

Electronic Appendix 2. Caledonian U–Pb magmatic ages, Norwegian Caledonides.

| Age (Ma)    | Rock type          | Geological unit and/or geographical location |                      | Ref. |
|-------------|--------------------|----------------------------------------------|----------------------|------|
| 426 +8/-2   | Syenite            | Fongen-Hyllingen Complex                     | Central Norway       | 1    |
| 427 ± 1     | Granite dykes      | Jotun Nappe Complex                          | South-west Norway    | 30   |
| 429 ± 2     | Tonalite           | Bindal batholith                             | North-central Norway | 2    |
| 430 ± 2     | Granodiorite       | Bindal batholith                             | North-central Norway | 2    |
| 431 ± 2     | Granite dyke       | Hellefjord formation                         | North                | 3    |
| 430 ± 4     | Granite dyke       | Skjøtingen nappe                             | Central Norway       | 4    |
| 433.8 ± 0.8 | Trondhjemite       | Innerdalen                                   | South-central Norway | 5    |
| 431 ± 4     | Trondhjemite       | Olaberget Complex                            | South-central Norway | 6    |
| 432 ± 3     | Trondhjemite       | Follestad                                    | Central Norway       | 7    |
| 434.8 ± 0.5 | Trondhjemite       | Innset massif                                | South-central Norway | 5    |
| 432 ± 4     | Trondhjemite       | Toset Complex                                | South-central Norway | 6    |
| 435.6 ± 0.6 | Granite            | Skarsvåg granite                             | North Norway         | 8    |
| 437 +1/-2   | Gabbro             | Råna intrusion                               | North Norway         | 9    |
| 435.8 ± 0.9 | Trondhjemite       | Innset massif                                | South-central Norway | 5    |
| 430 ± 7     | Monzodiorite       | Tosbotn                                      | North-central Norway | 10   |
| 435.1 ± 2.5 | Trondhjemite       | Vålåsø Complex                               | South-central Norway | 6    |
| 435.6 ± 2.3 | Trondhjemite       | Vålåsø Complex                               | South-central Norway | 6    |
| 436 ± 2     | Tonalite dyke      | Skjøtingen nappe                             | Central Norway       | 4    |
| 437 ± 1     | Tonalite dyke      | Narvik Nappe Complex                         | North Norway         | 11   |
| 437 ± 1     | Granite dyke       | Narvik Nappe Complex                         | North Norway         | 11   |
| 437.7 ± 0.8 | Trondhjemite       | Gia Complex                                  | South-central Norway | 6    |
| 438.2 ± 0.7 | Gabbro             | Honningsvåg Igneous Complex                  | North                | 8    |
| 437.6 ± 1.3 | Diorite            | Reitstøa Complex                             | Central Norway       | 6    |
| 437 ± 2     | Gabbro             | Sulitjelma Gabbro                            | North Norway         | 12   |
| 438.4 ± 0.9 | Granite            | Juldagnes granite                            | North                | 8    |
| 437.7 ± 1.6 | Granite            | Finnvik granite                              | North                | 8    |
| 437.8 ± 2.3 | Monzonite          | Fongen-Hyllingen Complex                     | Central Norway       | 6    |
| 438.7 ± 1.5 | Diorite            | Gia Complex                                  | South-central Norway | 6    |
| 438 ± 3     | Granite            | Bakfjord granite                             | North                | 13   |
| 437 ± 4     | Granodiorite       | 'Gåsvassfjellet' pluton                      | Central Norway       | 10   |
| 438 ± 4     | Volcaniclastic     | Hellefjord formation                         | North                | 13   |
| 438 ± 4.5   | Monzonite          | Gjæsingen Quartz Monzonite                   | Central Norway       | 14   |
| 437.5 ± 5.1 | Plagiogranite      | Halti Igneous Complex                        | North Norway         | 15   |
| 438 ± 5     | Granite            | Bakfjord granite                             | North                | 13   |
| 438 ± 5     | Granite            | Engesfjellet granite                         | North                | 13   |
| 440 ± 3     | Diorite            | Hitra diorite                                | Central Norway       | 14   |
| 441 ± 3     | Granitic gneiss    | Uthaug gneiss                                | Central Norway       | 14   |
| 441.2 ± 2.9 | Granite            | Lerberen granite                             | Central Norway       | 14   |
| 442 ± 3     | Diorite            | Hitra diorite                                | Central Norway       | 16   |
| 445         | Diorite            | Velfjord                                     | North-central Norway | 17   |
| 440 ± 5     | Tonalite           | Bremanger tonalite                           | North-west Norway    | 18   |
| 435 ± 10    | Monzonite          | Kalvvatnet monzonite                         | Central Norway       | 10   |
| 443 ± 2.5   | Granite            | Hitra granite                                | Central Norway       | 14   |
| 443 ± 3     | Diorite            | Solund-Stavfjord ophiolite                   | North-west Norway    | 19   |
| 437.9 ± 8.1 | Plagiogranite      | Halti Igneous Complex                        | North Norway         | 15   |
| 444.7 ± 1.4 | Hornblende diorite | Hitra diorite                                | Central Norway       | 14   |
| 443 ± 4     | Gabbro             | Gåsøy Intrusion                              | North-west Norway    | 18b  |
| 444 ± 3     | Diorite            | Simadalen diorite                            | Central Norway       | 14   |
| c. 447      | Diorite            | Velfjord                                     | North-central Norway | 17   |
| 445 ± 2     | Plagiogranite      | Halti Igneous Complex                        | North Norway         | 15   |
| c. 448      | Diorite            | Velfjord                                     | North-central Norway | 17   |
| 450 +4/-3   | Granite dyke       | Hitra                                        | Central Norway       | 16   |
| 446 ± 3     | Diorite            | Fillan diorite porphyry                      | Central Norway       | 14   |
| 447 ± 2     | Diorite            | Hilstadfjellet                               | North-central Norway | 20   |
| 445.7 ± 3.8 | Granodiorite       | Smøla granodiorite                           | Central Norway       | 14   |
| 443 ± 7     | Tonalite           | Kråkfjellet pluton                           | North-central Norway | 10   |
| 448 ± 2     | Diorite            | Akset-Drevli                                 | North-central Norway | 20   |

| Age (Ma)    | Rock type           | Geological unit and/or geographical location |                      | Ref. |
|-------------|---------------------|----------------------------------------------|----------------------|------|
| 447.1 ± 3.7 | Granite             | Velfjord                                     | North-central Norway | 17   |
| 447 ± 5     | Diorite             | Sausfjellet                                  | North-central Norway | 20   |
| 447 ± 7     | Porphyritic granite | Andalshatten pluton                          | North-central Norway | 10   |
| 444 ± 11    | Granite             | Heilhornet Pluton                            | North-central Norway | 21   |
| 456 ± 2     | Quartz monzodiorite | Møklevatnet Complex                          | Central Norway       | 22   |
| 456 ± 4     | Anorthosite dyke    | Skattøra migmatite complex                   | North Norway         | 23   |
| 458 ± 3     | Gabbro              | Grøndalsfjell Layered Series                 | Central Norway       | 22   |
| 460.7 ± 2.3 | Diorite gneiss      | Kjørsvika diorite gneiss                     | Central Norway       | 14   |
| 460 ± 3     | Tonalite gneiss     | Follafooss tonalite gneiss                   | Central Norway       | 14   |
| 455.7 ± 8.4 | Syenite             | Hortavær igneous complex                     | North-central Norway | 24   |
| 470 +9/-5   | Cpx gabbro          | Karmøy ophiolite                             | West Norway          | 19   |
| 468.9 ± 3.2 | Granite             | Vega pluton                                  | North-central Norway | 17   |
| 474 +3/-2   | Granite-pegmatite   | West Karmøy Igneous Complex                  | West Norway          | 25   |
| 472 ± 2     | Gabbro              | Vardafjell gabbro                            | West Norway          | 25   |
| 470.4 ± 3.6 | Granite             | Velfjord                                     | North-central Norway | 17   |
| 469 ± 5     | Tonalite dyke       | Lyngen Magmatic Complex                      | North Norway         | 26   |
| 473 ± 2     | Andesite            | Siggjo complex                               | West Norway          | 25   |
| 476.6 ± 2.1 | Diorite             | Kopparen diorite                             | Central Norway       | 14   |
| 477 ± 3     | Granite             | Vega pluton                                  | North-central Norway | 17   |
| 476 ± 4     | Rhyolite            | Katnakken volcanics                          | West Norway          | 25   |
| 479 ± 1     | Tonalite gneiss     | Ofoten Nappe Complex                         | North Norway         | 11   |
| 482 +6/-4   | Tonalite            | Gullfjellet ophiolite                        | West Norway          | 19   |
| c. 481      | Trondhjemite        | Bymarka ophiolite                            | Central Norway       | 27   |
| 483 +5/-3   | Tonalite            | Bjørkvatnet                                  | Central Norway       | 28   |
| 481.9 ± 1.5 | Felsic gneiss       | Lensvik gneiss                               | Central Norway       | 14   |
| 479 ± 5     | Quartz-diorite      | West Karmøy Igneous Complex                  | West Norway          | 25   |
| 477 ± 9.3   | Granite             | Velfjord                                     | North-central Norway | 17   |
| 485 ± 2     | Trondhjemite        | Karmøy ophiolite                             | West Norway          | 19   |
| 482 ± 5     | Rhyodacite          | Bymarka ophiolite                            | Central Norway       | 27   |
| 493 +7/-4   | Plagiogranite       | Karmøy ophiolite                             | West Norway          | 19   |
| 489 ± 3     | Plagiogranite       | Gullfjellet ophiolite                        | West Norway          | 19   |
| 494 ± 2     | Basalt              | Geitung unit                                 | West Norway          | 25   |
| 495 ± 3     | Trondhjemite sheet  | Ytterøya ophiolite                           | Central Norway       | 29   |
| 497 ± 2     | Trondhjemite        | Leka ophiolite                               | Central Norway       | 19   |

References: (1) Wilson *et al.* (1983), (2) Nissen *et al.* (2006), (3) Kirkland *et al.* (2006), (4) Nordgulen *et al.* (2002), (5) Nilsen *et al.* (2003), (6) Nilsen *et al.* (2007) (7), Dunning & Grenne (2000), (8) Corfu *et al.* (2006), (9) Tucker *et al.* (1990), (10) Nordgulen *et al.* (1993), (11) Northrup (1997), (12) Pedersen *et al.* (1991), (13) Kirkland *et al.* (2005), (14) Tucker *et al.* (2004), (15) Andréasson *et al.* (2003), (16) Tucker (1988), (17) Yoshinobu *et al.* (2002), (18) Hansen *et al.* (2002), (18b) R.B. Pedersen, unpub. data in (18), (19) Dunning & Pedersen (1988), (20) Pedersen *et al.* (1999), (21) Nordgulen & Schouenborg (1990), (22) Meyer *et al.* (2003), (23) Selbekk *et al.* (2000), (24) Barnes *et al.* (2003), (25) Pedersen & Dunning (1997), (26) Oliver & Krogh (1995), (27) Roberts *et al.* (2002), (28) Stephens *et al.* (1993), (29) Roberts & Tucker (1998), (30) Lundmark & Corfu (2007).
