# Supplementary material
Source: publisher figshare collection journal article supplement (https://geolsoc.figshare.com/articles/dataset/_/3452903)
Supplement: Supplementary file 3 [file 1]

Electronic Appendix 3. Caledonian U–Pb magmatic ages, Svalbard and East Greenland.

| Age             | Rock type          | Geological unit and/or geographical location |                                       | Ref. |
|-----------------|--------------------|----------------------------------------------|---------------------------------------|------|
| 409 $\pm$ 4/-8  | Granite            | Intrudes Smallefjord sequence                | Grandjean Fjord-Bessel Fjord (EGR)    | 12   |
| 412.5 $\pm$ 0.5 | Granite            | Rijpfjorden granite                          | Nordautlandet terrane (SVA)           | 2    |
| 417 $\pm$ 18/-7 | Granitoid          | Djupkilsodden pluton                         | Nordautlandet terrane (SVA)           | 3    |
| 413 $\pm$ 3     | Granite            | Intrudes Eleonore Bay Supergroup             | Payer Land (EGR)                      | 5    |
| 413 $\pm$ 3     | Granite            |                                              | Payer Land (EGR)                      | 5    |
| 418 $\pm$ 5/-18 | Monzonite          | Bregnepynt Monzonite                         | Scoresby Sund (EGR)                   | 18   |
| 418.4 $\pm$ 0.8 | Granitoid          | Hornemanntoppen granitoid                    | North-Western terrane (SVA)           | 4    |
| c. 420          | Granite            | Wisnesbreen granite                          | Nordautlandet terrane (SVA)           | 2    |
| 417 $\pm$ 3     | Granite            |                                              | Renland (EGR)                         | 8    |
| 422.2 $\pm$ 0.6 | Diorite            | Bjørnøer Diorite                             | Scoresby Sund (EGR)                   | 16   |
| 422.0 $\pm$ 1.2 | Granite            |                                              | Bartholin Nunatak (EGR)               | 9    |
| 423 $\pm$ 1.5   | Granitoid          | Bjørnfjorden                                 | North-Western terrane (SVA)           | 4    |
| 423 $\pm$ 2     | Monzonite          | Renland Monzonite                            | Scoresby Sund (EGR)                   | 16   |
| 423.5 $\pm$ 0.7 | Monzonite          | Bregnepynt Monzonite                         | Scoresby Sund (EGR)                   | 16   |
| 424 $\pm$ 1     | Granite            | Intrudes Eleonore Bay Supergroup             | Forsblad Fjord (EGR)                  | 10   |
| 423 $\pm$ 4.5   | Granodiorite       | Nordvestfjord Granodiorite                   | Scoresby Sund (EGR)                   | 16   |
| 424.6 $\pm$ 0.5 | Leucogranite       | Tindern allochthon                           | Forsblad Fjord (EGR)                  | 13   |
| 423.8 $\pm$ 1.5 | Granite            | Caledonia Ø Granite                          | Forsblad Fjord (EGR)                  | 13   |
| c. 426          | Granite            |                                              | Alpefjord (EGR)                       | 10   |
| 425.8 $\pm$ 2   | Granitic mylonite  |                                              | Fjord Region Detachment Zone (EGR)    | 15   |
| 426.6 $\pm$ 1.4 | Granite            |                                              | Intrudes Moskusoksefjord Inlier (EGR) | 9    |
| 426 $\pm$ 3     | Granite            |                                              | Payer Land (EGR)                      | 5    |
| 428.2 $\pm$ 1.0 | Leucogranite       | Intrudes Smallefjord Sequence                | Slamsø (EGR)                          | 14   |
| 428 $\pm$ 1.8   | Granite            | Intrudes Smallefjord Sequence                | Langsø (EGR)                          | 14   |
| 424 $\pm$ 6     | Monzonite          |                                              | Renland (EGR)                         | 8    |
| 429 $\pm$ 1     | Granite            | Intrudes Eleonore Bay Supergroup             | Bredefjord Granite (EGR)              | 14   |
| 430 $\pm$ 0.7   | Granitoid          | Newtontoppen Granitoid                       | North-Western terrane (SVA)           | 4    |
| 432 $\pm$ 9/-14 | Granite            | Intrudes Eleonore Bay Supergroup             | Grandjean Fjord-Bessel Fjord (EGR)    | 12   |
| 424 $\pm$ 8     | Monzonite          |                                              | Renland (EGR)                         | 8    |
| 426 $\pm$ 6     | Monzonite          | Øfjord Monzonite                             | Scoresby Sund (EGR)                   | 17   |
| 427 $\pm$ 6.3   | Granite            | Intrudes Eleonore Bay Supergroup             | Kap Klinkerfues Granite (EGR)         | 14   |
| 431.3 $\pm$ 2.8 | Granite            | Intrudes Eleonore Bay Supergroup             | Knæksø Granite (EGR)                  | 14   |
| 430 $\pm$ 6.5   | Granitic veins     | Junctiondal                                  | Fjord Region Detachment Zone (EGR)    | 15   |
| 431 $\pm$ 7     | Aplite dyke        | Kvitøya                                      | Nordautlandet terrane (SVA)           | 1    |
| 434 $\pm$ 5     | Granite dyke       |                                              | Renland (EGR)                         | 8    |
| 432 $\pm$ 8     | Granite            | Intrudes Krummedal sequence                  | Fränkel Land (EGR)                    | 7    |
| 433 $\pm$ 8     | Granite            | Intrudes Nathorst Land Group                 | Stauning Alper/Nathorst Land (EGR)    | 6    |
| 434 $\pm$ 8     | Syenite            | Nordmarka syenite                            | Nordautlandet terrane (SVA)           | 1    |
| 432 $\pm$ 10    | Monzonite          | Bregnepynt Monzonite                         | Scoresby Sund (EGR)                   | 11   |
| 440 $\pm$ 3     | Granite            | Nordkapp granite                             | Nordautlandet terrane (SVA)           | 2    |
| 438 $\pm$ 5     | Gabbro             | Intrudes Krummedal sequence                  | Fränkel Land (EGR)                    | 7    |
| 436 $\pm$ 8     | Granite            | Intrudes Krummedal sequence                  | Fränkel Land (EGR)                    | 7    |
| 434 $\pm$ 11    | Pegmatitic granite |                                              | Payer Land (EGR)                      | 5    |
| 440 $\pm$ 8     | Tonalite           | Intrudes Krummedal sequence                  | Fränkel Land (EGR)                    | 7    |

| Age      | Rock type      | Geological unit and/or geographical location |                             | Ref. |
|----------|----------------|----------------------------------------------|-----------------------------|------|
| 437 ± 12 | Granite        | Foynøane grey granite                        | Nordautlandet terrane (SVA) | 1    |
| 438 ± 14 | Granite        | Intrudes Krummedal sequence                  | Fränkel Land (EGR)          | 7    |
| 450 ± 1  | Quartz diorite | Danmark Ø Quartz diorite                     | Scoresby Sund (EGR)         | 16   |
| 454 ± 1  | Granodiorite   | Korridoren Granodiorite                      | Scoresby Sund (EGR)         | 16   |
| 466 ± 9  | Granodiorite   | Korridoren Granodiorite                      | Scoresby Sund (EGR)         | 11   |

Abbreviations: EGR=East Greenland Caledonides; SVA=Svalbard Caledonides.

References: (1) Johansson *et al.* (2004), (2) Johansson *et al.* (2002), (3) Gee *et al.* (1999), (4) Myhre (2005), (5) Gilotti & McClelland (2005), (6) Watt *et al.* (2000), (7) Kalsbeek *et al.* (2001), (8) Leslie & Nutman (2003), (9) Hartz *et al.* (2001), (10) Andresen *et al.* (1998), (11) Kalsbeek *et al.* (in press), (12) Hansen *et al.* (1994), (13) White *et al.* (2002), (14) Strachan *et al.* (2001), (15) Hartz *et al.* (2000), (16) Rehnström (2010), (17) Leslie & Nutman (2000), (18) Hansen & Friderichsen (1987).
