# Supplementary material
Source: publisher figshare collection journal article supplement (https://geolsoc.figshare.com/articles/dataset/_/3452903)
Supplement: Supplementary file 4 [file 1]

Electronic Appendix 5. Caledonian U–Pb magmatic ages, Newfoundland.

| Age (Ma),   | Rock type                      | Geological unit and/or geographical location |                 | Ref. |
|-------------|--------------------------------|----------------------------------------------|-----------------|------|
| 374 ± 2     | Granite                        | St. Lawrence Granite                         | Avalon Zone     | 37   |
| 378 ± 2     | Granite                        | Francois Granite                             | Gander Zone     | 37   |
| 384 ± 2     | Granite                        | Strawberry Granite                           | Dunnage Zone    | 29   |
| 386 ± 3     | Granite                        | Isle aux Morts Granite                       | Dunnage Zone    | 29   |
| 390 ± 3     | Granite                        | Chetwynd Granite                             | Dunnage Zone    | 20   |
| 396 +6/-3   | Granite                        | North Bay Granite Suite                      | Dunnage Zone    | 33   |
| 408 ± 2     | Granodiorite                   | Loon Bay granodiorite                        | Dunnage zone    | 1    |
| 408 ± 2     | Granodiorite                   | Loon Bay Batholith                           | Dunnage Zone    | 35   |
| 410 ± 2     | Granite                        | Middle Ridge granite                         | Gander zone     | 13b  |
| 420 +8/-2   | Tuff                           | Georges Brook Formation, La Poile Group      | Dunnage Zone    | 22   |
| 420 +8/-2   | Tuff                           | Georges Brook Formation, La Poile Group      | Dunnage Zone    | 33   |
| 418 +2/-1.5 | Porphyry                       | Hawks Nest Pond Porphyry                     | Dunnage Zone    | 20   |
| 415 ± 2     | Syenite                        | Skull Hill syenite                           | Dunnage zone    | 15   |
| 415 ± 2     | Granite                        |                                              | Gander zone     | 18   |
| 415 ± 2     | Granite                        | Burgeo Intrusive Suite                       | Dunnage Zone    | 33   |
| c. 418      | Granite                        | Locker's Bay granite                         | Gander zone     | 21   |
| 417 ± 2     | Granite                        | Cape Freels granite                          | Gander zone     | 13b  |
| 418 ± 2     | Granite                        | Rose Blanche granite                         | Gander zone     | 12   |
| 419 ± 2     | Granite                        | Otter Point granite                          | Gander zone     | 20   |
| 423 +3/-2   | Tuff                           | Stony Lake Volcanics                         | Dunnage Zone    | 33   |
| 423 +3/-2   | Rhyolite                       | Phillips Brook Rhyolite                      | Dunnage Zone    | 20   |
| 424 +7/-3   | Rhyolite                       | Georges Brook Formation, La Poile Group      | Dunnage Zone    | 33   |
| 424 +4/-3   | Gabbro sill                    | unnamed, intrudes Windsor Point Group        | Dunnage Zone    | 29   |
| 421 ± 2     | Granite                        | Gaultois granite                             | Gander zone     | 18   |
| 421 ± 2     | Granite                        | Gaultois Granite                             | Gander Zone     | 33   |
| c. 424      | Gabbro                         | Mount Peyton intrusive suite                 | Dunnage zone    | 19   |
| 422 ± 2     | Granite                        | Port Albert Peninsula dyke                   | Dunnage Zone    | 35   |
| 423 ± 2     | Granite                        | Wild Cove Pond intrusive suite               | Humber zone     | 14   |
| 424 ± 2     | Granite                        | Windowglass Hill Granite                     | Dunnage Zone    | 29   |
| 429 +7/-3   | Rhyolite                       | Bear Pond Rhyolite                           | Dunnage Zone    | 33   |
| 429 +5/-3   | Granite                        | Burgeo intrusive suite                       | Gander zone     | 18   |
| 429 +5/-3   | Granodiorite                   | Burgeo Intrusive Suite                       | Dunnage Zone    | 33   |
| 429 +6/-5   | Rhyolite                       | Springdale Group                             | Dunnage Zone    | 24   |
| 427 ± 2     | Granite                        | Wild Cove Pond intrusive suite               | Humber zone     | 14   |
| 427 ± 3     | Granodiorite, syenite, granite | Topsails intrusive suite                     | Dunnage zone    | 3    |
| 429 ± 2     | Granodiorite                   | Western Head Granite                         | Gander Zone     | 20   |
| 429 ± 2     | Tuff                           | Grand Bruit Gull Pond tuff, La Poile Group   | Gander Zone     | 20   |
| 429 ± 3     | Granite                        | Dunamagon granite                            | Humber zone     | 14   |
| 429 ± 3     | Granodiorite, syenite, granite | Topsails intrusive suite                     | Dunnage zone    | 3    |
| 429 ± 4     | Felsic volcanics               | Springdale Group                             | Dunnage zone 16 |      |
| 431 ± 2     | Gabbro, diorite                | Main Gut intrusion                           | Dunnage zone    | 18   |
| 435 +6/-3   | Gabbro, diorite                | Boogie Lake intrusion                        | Dunnage zone    | 18   |
| 431 ± 2     | Gabbro                         | Main Gut intrusion                           | Dunnage Zone    | 33   |
| 435 +6/-3   | Monzonite                      | Boogie Lake complex                          | Dunnage Zone    | 33   |
| 432 ± 2     | Granodiorite                   | Burlington granodiorite                      | Dunnage zone    | 14   |
| 432 ± 2     | Granite                        | Coney Head Complex                           | Dunnage Zone    | 30   |
| 440 ± 2     | Granodiorite                   | Glover Island Granodiorite                   | Dunnage Zone    | 23   |
| 438 ± 8     | Gabbro, diorite                | Rainy Lake complex                           | Dunnage zone    | 3    |
| 452 +28/-11 | Tuff                           | Georges Brook Formation, La Poile Group      | Dunnage Zone    | 25   |

| Age (Ma),     | Rock type                  | Geological unit and/or geographical location |                                | Ref.  |
|---------------|----------------------------|----------------------------------------------|--------------------------------|-------|
| 435 ± 15      | Syenite                    | Seal Island Bight syenite                    | Dunnage zone                   | 17    |
| 453 +5/-4     | Rhyolite                   | Windsor Point Group                          | Dunnage Zone                   | 29    |
| 453 ± 3       | Granite                    | Port-aux-Basques granite                     | Dunnage Zone                   | 12    |
| 457.0 ± 3.7   | Tuff                       | Healy Bay Formation                          | Dunnage Zone                   | 43    |
| 458 +29/-22   | Tuff                       | Dolman Cove formation, Bay du Nord Group     | Dunnage Zone                   | 25    |
| 459 +24/-16   | Granite                    | Dunamagon Granite                            | Dunnage/Humber Zones           | 27    |
| 456 ± 3       | Tonalite, granodiorite     | Burgeo Road                                  | Dunnage zone                   | 4     |
| 456 ± 3       | Tonalite                   | Southwest Brook tonalite                     | Dunnage Zone                   | 22    |
| 456 ± 3       | Tonalite                   | Southwest Brook tonalite                     | Dunnage Zone                   | 34    |
| 462 ± 1.3     | Tuff                       | Healy Bay Formation                          | Dunnage Zone                   | 43    |
| 462 +4/-2     | Rhyolite                   | Victoria Lake Group                          | Dunnage Zone                   | 32    |
| 463 ± 3       | Felsic tuff                | Healy Bay Formation                          | Dunnage Zone                   | 43    |
| 464 +4/-3     | Pegmatitic granite         | Through Hill granite                         | Dunnage zone                   | 9, 10 |
| 464 +4/-3     | Granite                    | Through Hill Granite                         | Gander Zone                    | 10    |
| 463.7 ± 2     | Gabbro sill                | Thwart Island gabbro                         | Dunnage Zone                   | 20    |
| 464 ± 2       | Granite                    | Great Burnt Lake granite                     | Dunnage zone                   | 9, 10 |
| 464 ± 2       | Granite                    | Great Burnt Lake Granite                     | Gander Zone                    | 10    |
| 464.8 ± 3.5   | Trondhjemite               | Skidder Formation                            | Dunnage Zone                   | 43    |
| 465 ± 2       | Tuff                       | Healy Bay Formation                          | Dunnage Zone                   | 43    |
| c. 467        | Granite                    | Coaker porphyry                              | Dunnage zone                   | 1b    |
| 469 +5/-3     | Rhyolite                   | Cutwell Group                                | Dunnage zone                   | 22    |
| 466 ± 3       | Tuff                       | Bay du Nord Group                            | Dunnage Zone                   | 33    |
| 460 ± 10      | Granodiorite               | Hinds Lake granodiorite                      | Dunnage zone                   | 3     |
| 468 ± 2       | Tuff                       | Twillick Brook Member, Baie d'Espoir Group   | Dunnage Zone                   | 10    |
| 460 ± 10      | Charnockite                | Cormacks Lake complex                        | Humber Zone                    | 26    |
| 469 ± 2       | Tonalite                   | Cape Ray Igneous Complex                     | Dunnage Zone                   | 29    |
| 473 +3/-2     | Rhyolite                   | Buchans Group                                | Dunnage zone                   | 22    |
| 473 +3/-2     | Rhyolite                   | Buchans Group                                | Dunnage Zone                   | 32    |
| 472 +2/-9     | Gabbro sill                | Wild Bight Group                             | Dunnage Zone, Exploits Subzone | 38    |
| 474 +6/-3     | Granite                    | Partridgeberry Hills Granite                 | Dunnage Zone                   | 10    |
| 474 +6/-4     | Granite                    | Partridgeberry Hills granite                 | Dunnage zone                   | 9     |
| 471 ± 2       | Tuff                       | Pig Island tuff, Wild Bight Broup            | Dunnage Zone, Exploits Subzone | 38    |
| 472 ± 2       | Tonalite                   | Cape Ray area                                | Dunnage zone                   | 5, 6  |
| 467 ± 8       | Gabbro, diorite, tonalite  | Hungry Mountain complex                      | Dunnage zone                   | 3     |
| c. 475        | Trondhjemite               | Costigan Lake pluton                         | Dunnage zone                   | 13    |
| 473 ± 2       | Rhyolite                   | Roberts Arm Group                            | Dunnage Zone                   | 22    |
| 473 ± 2       | Rhyolite                   | Roberts Arm Group                            | Dunnage Zone                   | 32    |
| 473.0 ± 3.7   | Leucogabbro                | Lloyds River Complex                         | Dunnage zone                   | 43    |
| 473 ± 1       | Felsic tuff                | Mink Lake Formation                          | Dunnage Zone                   | 43    |
| 471 ± 4       | Gabbro sill                | Wild Bight Group                             | Dunnage Zone, Exploits Subzone | 38    |
| 472 ± 3       | Tuff                       | Locks Harbour tuff, Wild Bight Group         | Dunnage Zone, Exploits Subzone | 38    |
| 472 ± 3       | Tuff                       | Duck Island tuff, Wild Bight Group           | Dunnage Zone, Exploits Subzone | 38    |
| 474 ± 2       | Diorite, tonalite, granite | Coney Head allochthon                        | West coast allochthons         | 8     |
| 474 ± 2       | Tonalite                   | Coney Head Complex                           | Dunnage Zone                   | 30    |
| 472 ± 4       | Granite                    | Woodford's Arm pluton                        | Dunnage Zone                   | 36    |
| 477.5 +2.6/-2 | Trondhjemite               | Annieopsquotch Complex                       | Dunnage Zone                   | 31    |
| 480 +4/-3     | Tuff                       | Catcher's Pond Group                         | Dunnage Zone                   | 41    |
| 477.6 ± 1.8   | Granite                    | Baggs Hill Granite                           | Dunnage Zone                   | 42    |
| 478 ± 2       | Granite                    | Baggs Hill granite                           | Dunnage zone                   | 11    |

| Age (Ma),                | Rock type                            | Geological unit and/or geographical location       |                                   | Ref.      |
|--------------------------|--------------------------------------|----------------------------------------------------|-----------------------------------|-----------|
| 483 $\pm$ 3/-2           | Gabbro sill                          | Stog'er Tight Gabbro                               | Humber Zone                       | 40        |
| 479 $\pm$ 3              | Quartz-feldspar<br>granitoid         | Mansfield Cove pluton                              | Dunnage zone                      | 2         |
| 479 $\pm$ 3              | Plagiogranite                        | Mansfield Cove Complex                             | Dunnage Zone                      | 32        |
| 485.7 $\pm$ 1.9/-<br>1.2 | Trondhjemite                         | Bay of Islands Complex                             | Humber Zone                       | 31        |
| 484 $\pm$ 2              | Tuff                                 | Fortune Harbour Formation,<br>Cottrells Cove Group | Dunnage Zone                      | 28        |
| 484 $\pm$ 5              | Plagioclase-rich<br>granitoid        | Bay of Islands complex                             | West coast allochthons            | 7         |
| 486 $\pm$ 3              | Tonalite                             | South Lake Igneous Complex                         | Dunnage Zone,<br>Exploits Subzone | 39        |
| 486 $\pm$ 3              | Tuff                                 | Tea Arm Formation, Exploits<br>Group               | Dunnage Zone                      | 20        |
| 488 $\pm$ 2              | Granodiorite                         | Cape Ray area                                      | Dunnage zone                      | 5, 6      |
| 505 $\pm$ 3/-2           | Gabbro, amphibolite,<br>trondhjemite | Little Port complex                                | West coast allochthons            | 7         |
| 507 $\pm$ 3/-2           | Quartz-plagioclase<br>granitoid      | Twillingate pluton                                 | Dunnage zone                      | 1         |
| 430–425                  | Volcanics                            | Cape St. John Group                                | Dunnage zone                      | 14,<br>17 |

References: (1) Elliot *et al.* (1991), (1b) Dunning in (1), (2) Dunning *et al.* (1987), (3) Whalen *et al.* (1987), (4) Dunning *et al.* (1989), (5) Dubé *et al.* (1994), (6) Dubé *et al.* (1993), (7) Jenner *et al.* (1991), (8) Dunning (1987a), (9) Colman-Sadd (1985), (10) Colman-Sadd *et al.* (1992), (11) Tucker *et al.* (1994), (12) van Staal *et al.* (1994), (13) Kerr (1997), (13b) Tucker in (13), (14) Cawood & Dunning (1993), (15) Kean & Jayasinghe (1982), (16) Coyle & Strong (1987), (17) DeGrace *et al.* (1976), (18) Dunning *et al.* (1990), (19) Dickson (1993), (20) O'Brien *et al.* (1991), (21) Dunning (1993), (22) Dunning & Krogh (1991), (23) Cawood *et al.* (1996), (24) Chandler *et al.* (1987), (25) Chorlton & Dallmeyer (1986), (26) Currie *et al.* (1992), (27) Dallmeyer & Hibbard (1984), (28) Dec *et al.* (1997), (29) Dube *et al.* (1996), (30) Dunning (1987b), (31) Dunning & Krogh (1985), (32) Dunning *et al.* (1987), (33) Dunning *et al.* (1990a), (34) Dunning (1989), (35) Elliott *et al.* (1991), (36) Kerr & Dunning (2003), (37) Kerr *et al.* (1993), (38) MacLachlan & Dunning (1998), (39) MacLachlan & Dunning (1998), (40) Ramezani *et al.* (2002), (41) Ritcey *et al.* (1995), (42) Tucker *et al.* (1994), (43) Zagorevski *et al.* (2006).
