# Supplementary material
Source: publisher figshare collection journal article supplement (https://geolsoc.figshare.com/articles/dataset/_/3452903)
Supplement: Supplementary file 5 [file 1]

Electronic Appendix 4. Caledonian U–Pb magmatic ages, British and Irish Caledonides.

| Age (Ma)    | Rock type               | Geological unit and/or geographical location        |                                 | Ref.   |
|-------------|-------------------------|-----------------------------------------------------|---------------------------------|--------|
| 400–415     | Granite                 | Lochnagar granite                                   | Northern Highlands (SCO)        | 9      |
| 400 ± 10    | Granodiorite            | Laggan granite                                      | Northern Highlands (SCO)        | 9      |
| c. 405      | Granodiorite            | Ben Cruachan granite                                | Northern Highlands (SCO)        | 9      |
| 405 ± 11    | Granite                 | Vagastie Bridge granite                             | Strath Vagastie (SCO)           | 9      |
| 406 ± 6     | Andesite / rhyolite     | Glencoe Volcanic Complex                            | W Highlands (SCO)               | 23     |
| 412 ± 3     | Granite                 | Malin Head Granite                                  | Donegal Granite (IRL)           | 24     |
| c. 417      | Granodiorite            | Cluanie granite                                     | Northern Highlands (SCO)        | 9      |
| c. 420      | Granite                 | Helmsdale granite                                   | Northern Highlands (SCO)        | 9      |
| 420 ± 6     | Granite                 | Klibreck granite                                    | Intrudes Moine Supergroup (SCO) | 4      |
| 422 ± 2     | Granite                 | Tullagh Point Granite                               | Donegal Granite (IRL)           | 24     |
| 425 ± 3     | Granodiorite            | Strontian granodiorite                              | W Highlands (SCO)               | 3      |
| 425 ± 3     | Diorite                 | Ratagain intrusion                                  | W Highlands (SCO)               | 3      |
| 426 ± 2     | Granite                 | Strath Halladale Granite                            | East Sutherland (SCO)           | 14     |
| 426 ± 3     | Appinite                | Arrochar complex                                    | W Highlands (SCO)               | 3      |
| 427 ± 1     | Appinite / monzodiorite | Ballachulish Igneous Complex                        | W Highlands (SCO)               | 23     |
| 427.8 ± 1.9 | Tonalite                | Clunes Tonalite                                     | Intrudes Moine Supergroup (SCO) | 2      |
| 427 ± 3     | Appinite                | Rubha Mór appinite pipe                             | W Highlands (SCO)               | 3      |
| 429 ± 2     | Appinite                | Garabal Hill/Glen Fyne complex                      | W Highlands (SCO)               | 3      |
| 424 ± 8     | Granite                 | Vagastie Bridge granite                             | Intrudes Moine Supergroup (SCO) | 4      |
| 430 ± 4     | Alkaline granitoids     | Loch Borrolan complex                               | Moine Thrust Zone (SCO)         | 7      |
| 430 ± 4     | Syenite                 | Loch Borrolan complex                               | Assynt (SCO)                    | 19     |
| 426 ± 9     | Syenite                 | Cnoc-nan-Cuilean syenite                            | Loch Loyal (SCO)                | 21     |
| 429 ± 11    | Granite                 | Strathnaver granite                                 | Intrudes Moine Supergroup (SCO) | 4      |
| 439 ± 4     | Syenite                 | Loch Ailsh intrusion                                | Assynt (SCO)                    | 21     |
| 435 ± 10    | Tonalite                | Strontian granite                                   | Northern Highlands (SCO)        | 9      |
| 439 ± 8.8   | Hornblende              | Kiloran Bay intrusion                               | Colonsay (SCO)                  | 8      |
| 457 ± 0.9   | Granite                 | Kennethmont granite                                 | Grampian terrane (SCO)          | 5      |
| 456 ± 5     | Syenite                 | Glen Dessary Syenite                                | Inverness-shire (SCO)           | 20     |
| 462.5 ± 1.2 | Granite                 | Oughterard granite                                  | Connemara (IRL)                 | 1      |
| 463 ± 4     | Quartz diorite          | Connemara Complex                                   | Connemara (IRL)                 | 12     |
| 467 ± 2     | Granite pegmatite       | Connemara Complex                                   | Connemara (IRL)                 | 13     |
| 467.9 ± 1.2 | Quartz diorite gneiss   | Connemara Complex                                   | Connemara (IRL)                 | 13     |
| c. 470      | Monzonite               | Morven Cabrach intrusion, part of the Newer Gabbros | Scottish Highlands (SCO)        | 18     |
| 470 ± 1     | Granite                 | Aberdeen granite                                    | Grampian terrane (SCO)          | 6      |
| 470.1 ± 1.4 | Gabbro                  | Cashel–Lough Wheelaun gabbro                        | Connemara (IRL)                 | 1      |
| 466 ± 6     | Granite                 | Connemara Complex                                   | Connemara (IRL)                 | 12     |
| 467.1 ± 5.9 | Granite                 | Strichen granite                                    | Grampian terrane (SCO)          | 5      |
| 467 ± 6     | Tonalite                | Ballygawley Tonalite                                | Sliswood Division (IRL)         | 15     |
| 474.5 ± 1   | Gabbro                  | Currywongaun gabbro                                 | Connemara (IRL)                 | 1      |
| 468 ± 8     | Gabbro                  | Newer gabbros                                       | Grampians (SCO)                 | 10     |
| 471 ± 5     | Granite                 | Lough Keola Granite Sheet                           | Sliswood Division (IRL)         | 15     |
| 472 ± 6     | Tonalite                | Giant's Rock Tonalite                               | Sliswood Division (IRL)         | 15     |
| 474 ± 5     | Granite                 | Ballygawley Granite                                 | Sliswood Division (IRL)         | 15     |
| 470 ± 9     | Syenogabbro             | Insch gabbro, part of the Newer Gabbros             | Scottish Highlands (SCO)        | 18     |
| 475 ± 5     | Granite                 | Strichen granite                                    | Northern Highlands (SCO)        | 9      |
| 474.6 ± 5.5 | Meta-rhyolite           | Delaney Dome Formation                              | Connemara (IRL)                 | 16, 17 |
| 475 ± 7     | Granite                 | Ardclach granite                                    | Grampian Highlands (SCO)        | 22     |

| <b>Age (Ma)</b> | <b>Rock type</b> | <b>Geological unit and/or geographical location</b> | <b>Ref.</b> |
|-----------------|------------------|-----------------------------------------------------|-------------|
| 492 ± 3         | Plagiogranite    | Shetland Island oceanic<br>fragment                 | 11          |

Abbreviations: SCO=Scottish Caledonides; IRL=Irish Caledonides.

References: (1) Friedrich (1999), (2) Stewart *et al.* (2001), (3) Rogers & Dunning (1991), (4) Kinny *et al.* (2003), (5) Oliver *et al.* (2000), (6) Kneller & Aftalion (1987), (7) Aftalion (1979), (8) Muir *et al.* (1997), (9) Pidgeon & Aftalion (1978), (10) G. Rogers *et al.* (1994), (11) Spray & Dunning (1991), (12) Cliff *et al.* (1993), (13) Friedrich *et al.* (1999), (14) Kocks *et al.* (2006), (15) Flowerdew *et al.* (2005), (16) Draut & Clift (2002), (17) Friedrich (1998), (18) Dempster *et al.* (2002), (19) van Breemen *et al.* (1979a), (20) van Breemen *et al.* (1979b), (21) Halliday *et al.* (1987), (22) Zaleski (1983), (23) Fraser *et al.* (2004), (24) Kirkland *et al.* (2008b).
